1

2

3

4 Hexokinase and glucokinases are essential for fitness and virulence in  
5 the pathogenic yeast *Candida albicans*

6

7 Romain Laurian<sup>1</sup>, Karine Dementhon<sup>3</sup>, Bastien Doumèche<sup>2</sup>, Alexandre Soulard<sup>1</sup>, Thierry

8 Noel<sup>3</sup>, Marc Lemaire<sup>1</sup>, Pascale Cotton<sup>1\*</sup>

9

10

11 <sup>1</sup>Génétique Moléculaire des Levures, UMR-CNRS 5240 Microbiologie Adaptation et  
12 Pathogénie, Université de Lyon, Lyon, France, Université Lyon1, Lyon France

13

14 <sup>2</sup>Institut de Chimie et Biochimie Moléculaires et Supramoléculaires, Université de Lyon,  
15 Lyon, France, Université Lyon1, Lyon France

16

17 <sup>3</sup>Laboratoire de Microbiologie Fondamentale et Pathogénicité, UMR-CNRS 5234, Université  
18 de Bordeaux, Bordeaux, France

19

20

21

22 \*Corresponding author

23 E-mail : [pascale.cotton@univ-lyon1.fr](mailto:pascale.cotton@univ-lyon1.fr)

24

## 1 **Abstract**

2 Metabolic flexibility promotes infection and commensal colonization by the opportunistic  
3 pathogen *Candida albicans*. Yeast cell survival depends upon assimilation of fermentable  
4 and non-fermentable locally available carbon sources. Physiologically relevant sugars like  
5 glucose and fructose are present at low level in host niches. However, because glucose is the  
6 preferred substrate for energy and biosynthesis of structural components, its efficient  
7 metabolization is fundamental for the metabolic adaptation of the pathogen. We explored  
8 and characterized the *C. albicans* hexose kinase system composed of one hexokinase  
9 (*CaHxk2*) and two glucokinases (*CaGlc1* and *CaGlc4*). Using a set of mutant strains, we found  
10 that hexose phosphorylation is mostly assured by *CaHxk2*, which sustains growth on  
11 hexoses. Our data on hexokinase and glucokinase expression point out an absence of cross  
12 regulation mechanisms at the transcription level and different regulatory pathways. In the  
13 presence of glucose, *CaHxk2* migrates in the nucleus and contributes to the glucose  
14 repression signaling pathway. In addition, *CaHxk2* participates to oxidative, osmotic and cell  
15 wall stress responses, while glucokinases are overexpressed under hypoxia. Hexose  
16 phosphorylation is a key step necessary for filamentation, that is affected in the hexokinase  
17 mutant. Virulence of this mutant is clearly impacted in the *Galleria mellonella* and  
18 macrophage models. Filamentation, glucose phosphorylation and stress response defects of  
19 the hexokinase mutant prevent host killing by *C. albicans*. By contributing to metabolic  
20 flexibility, stress answer response and morphogenesis, hexose kinase enzymes play an  
21 essential role in the virulence of *C. albicans*.

22

## 23 **Author summary**

24 The pathogenic yeast *C. albicans* is both a powerful commensal and pathogen of humans  
25 that can infect wide range of organs and body sites. To grow in its host and establish an  
26 infection, the pathogen must assimilate carbon from these heterogenous environments. *C.*  
27 *albicans* regulates central carbon metabolism in a niche-specific manner, activating  
28 alternatively gluconeogenesis, glyoxylate cycle and the glycolytic metabolism. For yeast and  
29 other microorganisms, glucose is the preferred carbon and energy source and its accurate  
30 detection and metabolism is essential. However, the glycolytic hexose kinase system has not  
31 been investigated yet in *C. albicans*. In this report, we showed that hexokinase and  
32 glucokinases contribute to the fitness and virulence of *C. albicans*. We revealed the main  
33 metabolic role of the hexokinase *CaHxk2* which impacts on growth, glucose signalling,  
34 morphological transition and virulence. However, glucokinases contribute to the anoxic  
35 response and their implication in regulation processes is suggested.

36

## 37 **Introduction**

38 *C. albicans* is an opportunistic pathogen which exists in a relatively harmless state in the  
39 microbial flora of healthy individuals. It is notably present on the mucosal surfaces  
40 composing the digestive tract [1,2]. Perturbations of the normal microbiota, use of medical  
41 implants, or predisposing factors like diabetes can trigger *C. albicans* infection. *C. albicans* is  
42 the most common cause of fungal nosocomial infections associated with high mortality rates  
43 in immunocompromised patients [3-5].

44 *C. albicans* colonizes diverse host microenvironments such as skin, mucosa, blood,  
45 organs, [1]. Among the wide range of virulence traits, survival at 37°C, pH and osmolarity  
46 adaptation, secretion of lytic enzymes, alteration of the immune response, morphological

47 changes such as a transition between yeast and hyphae, occur during infection and promote  
48 host invasion [6]. Another crucial factor is the metabolic capacity to assimilate host  
49 nutrients. The importance of metabolic flexibility to promote systemic infection and  
50 commensal colonization has been clearly emphasized during the past years. Genomic tools  
51 revealed that rapid transcriptional responses take place to set up a niche-specific carbon  
52 metabolism [7-11]. Utilization of alternative non-fermentable sources through the glyoxylate  
53 and gluconeogenesis pathways is essential to support *C. albicans* proliferation *in vivo*  
54 [12,13]. However, physiologically relevant hexose sugars like glucose, galactose, and fructose  
55 are transiently available at low level in the gastrointestinal tract and only glucose (0.05 to  
56 0.1%) is present in the bloodstream [9,13,14]. During colonization of plasma, kidneys and  
57 liver by *C. albicans* [14-16], expression of infection-associated genes involved in glycolysis  
58 has been reported. Complete glycolytic activation by the two key transcriptional regulators  
59 Gal4p and Tye7p is required for full virulence in *Galleria mellonella* and mice [17]. Glucose is  
60 the preferred substrate for ATP generation, metabolic precursors synthesis and maintenance  
61 of a reductive potential in eukaryotes [18,19]. Hence, accurate and efficient glucose  
62 detection and metabolization pathways constitute a fundamental basis for metabolic  
63 adaptation of the pathogen. In *C. albicans*, there are 20 predicted glucose transporters, one  
64 of them, *CaHgt4*, a high affinity sensor of the SRR pathway (Sugar Receptor Repressor), is  
65 essential for low glucose level induction of six of the *C. albicans* transporters. In addition,  
66 *CaHgt4* is also required for filamentation and contributes to virulence in mice [20,21].

67         Once detected, the initial step in glucose utilization is its transport and following  
68 activation to a sugar phosphate. Most fungi contain at least two active hexose kinases:  
69 glucokinase and hexokinase. In *S. cerevisiae*, the hexokinase Hxk2 is the predominant  
70 glucose kinase in cells growing in high glucose conditions [22]. Both enzymes can support

71 growth on glucose but hexokinases and glucokinases can also phosphorylate other hexoses  
72 like fructose and mannose [23]. The enzymatic equipment for hexose phosphorylation varies  
73 among different yeasts, although no physiological explanation for the differences has been  
74 found. A search in the genome of *C. albicans* revealed the presence of two hexokinases  
75 (*CaHXX1* and *CaHXX2*) and two glucokinase genes (*CaGLK1* and *CaGLK4*). The hexokinase  
76 *CaHxk1* does not phosphorylate glucose but GlcNAc, an extracellular carbon source present  
77 in the mucous membranes, triggering the transition between yeast and hyphal form [24,25].  
78 However, the hexokinase *CaHxk2* and the glucokinases *CaGlk1* and *CaGlk4* have not been  
79 characterized so far and their respective role in *C. albicans* fitness and virulence have not  
80 been investigated yet. Moreover, nothing is known on the enzymatic functions of *CaHxk2*,  
81 *CaGlk1* and *CaGlk4* and their putative dual regulatory role in glucose repression. The  
82 preferential use of glucose by yeasts results from glucose-induced transcriptional repression  
83 via the *CaSnf1*, essential AMP-kinase, which phosphorylates the transcription factor *CaMig1*  
84 [26,27]. Based on the *S. cerevisiae* model, *CaMig1* should form a necessary complex with the  
85 hexokinase *CaHxk2* to shuttle in the nucleus and generate the glucose repression signal [28],  
86 but this particular step has not been described yet in *C. albicans*.

87 In this study, we evaluated the contribution of *CaHxk2*, *CaGlk1* and *CaGlk4* to the  
88 phosphorylation of hexoses and to the glucose repression process. Substantial insights in the  
89 functional consequences of hexokinase and/or glucokinases deficiency for *C. albicans*  
90 growth, various stress responses, morphological transition and virulence are also proposed.

91

## 92 **Results**

### 93 **Deciphering the hexose kinase activity in *C. albicans***

94 One hypothetical hexokinase (*CaHXK2*, GenBank XM\_712312) and two hypothetical  
95 glucokinase genes (*CaGLK1*, GenBank XM\_705084 and *CaGLK4*, GenBank XM\_707231) were  
96 found in the genomic sequence of *C. albicans* (<http://www.candidagenome.org/>). Analysis of  
97 the *C. albicans HXK2*, *GLK1* and *GLK4* sequences revealed the presence of a classical hexose  
98 kinase conserved domain organized in two regions (<http://prosite.expasy.org/>): a small and  
99 a large subdomain. The small subdomain contains the sugar-binding site of typical hexose  
100 kinases: -LGFTFSF/YP- [29]. Protein function prediction (<http://bioinf.cs.ucl.ac.uk>) revealed  
101 that *CaHxk2*, *CaGlk1* and *CaGlk4* are involved in phosphate-containing compound metabolic  
102 processes, transferase activity and ATP-binding. The localization of these conserved domains  
103 is provided in S1 Table [30,31]. Two nuclear localization sequences have been identified in  
104 the hexokinase sequence: -PAQKRKGTFT- (8-17) and -QKRGYKTAH- (405-413). These  
105 sequences were not found in the glucokinase sequences. Both glucokinase and hexokinase  
106 genes are located on chromosome R (Fig. 1A), spaced by 70 Kbp and oriented in opposite  
107 directions. The *CaGLK1* and *CaGLK4* sequences share 98.6% and 99.2% identity at the  
108 nucleotide and amino acid level, respectively. Alignment of the *CaGLK1* and *CaGLK4* genomic  
109 regions, showed that a high level of identity (98%) spanned from 1500 bp before and after  
110 the coding sequences. Within these conserved regions, separated by a few hundred of base  
111 pairs, both glucokinase genes are framed by two uncharacterized coding sequences.  
112 Alignment of these sequences, spanning the 5' and 3' regions of both glucokinases, revealed  
113 a level of 95.1% and 98.8% identity, respectively. This strongly indicates that the whole  
114 conserved region containing the *CaGLK1* and *CaGLK4* genes has been duplicated and  
115 conserved.

116 To identify the function of *CaHXK2*, *CaGLK1* and *CaGLK4*, a set of gene disruption  
117 strains was constructed into the *C. albicans* wild type strain SC5314. Single homozygous null

118 *Cahxk2* (*Cahxk2Δ/Δ*) and *Caglk1* (*Caglk1Δ/Δ*) mutants, double homozygous null *CaHXX2*  
119 *CaGLK1* (*Cahxk2glk1Δ/Δ*) and *CaGLK1 CaGLK4* (*Caglk1glk4Δ/Δ*) mutants were constructed by  
120 replacing both wild type alleles using the excisable *CaSAT1* flipper cassette [32]. A *CaHXX2*  
121 complemented strain (*Cahxk2Δ/Δ c/c*) was also constructed by reintegrating the wild type  
122 coding sequence at the *HXK2* locus, using the same strategy (S1 Appendix).

123 To investigate the contribution of *CaHxk2*, *CaGlc1* and *CaGlc4* to the phosphorylation  
124 of hexoses in *C. albicans*, we measured the hexose kinase activity displayed by the wild type  
125 strain (SC5314) and the generated mutant strains (Fig 1B). Data obtained with *Cahxk2Δ/Δ*  
126 cell extracts revealed that glucose kinase and mannose kinase activities decreased by 65 %  
127 and 75 %, respectively, while the phosphorylation of fructose was totally abolished. This  
128 suggests that other enzymes, like glucokinases, could phosphorylate glucose and mannose,  
129 while fructose is phosphorylated by *CaHxk2* only. Values obtained with the complemented  
130 strain *Cahxk2Δ/Δ c/c*, statistically comparable to the data from the wild type strain, indicated  
131 that the lack of fructose phosphorylation was due to the deletion of the gene. Deletion of  
132 one or both glucokinase genes (*CaGLK1*, *CaGLK4*) had no apparent consequence on the level  
133 of hexose phosphorylation, suggesting that glucokinase activity could be compensated by  
134 the hexokinase activity. Hexose kinase activity measured in the *Cahxk2Δ/Δ* strain  
135 corresponds to the sum of the activities of *CaGlc1* and *Caglk4* (33% of the total activity).  
136 Glucose kinase activity, measured in the double mutant strain *Cahxk2glk1Δ/Δ*, which  
137 corresponds to the activity of *CaGlc4*, was drastically reduced compared to the *Cahxk2Δ/Δ*  
138 mutant. This activity corresponds to 6% of the total glucose kinase activity. Taken together  
139 these results suggest that glucokinases enzymes contribute unevenly and seem to play a  
140 minor role in glucose and mannose phosphorylation.

141 To further investigate the specificity of *CaHxk2*, *CaGlk1* and *CaGlk4*, we determined  
142 their apparent Michaelis constant for glucose (Fig 1C). Apparent  $K_m$  of *CaHxk2* was measured  
143 in the *Cagl1glk4Δ/Δ* strain, while the  $K_m$  of *Glk4* was determined in *Cahxk2glk1Δ/Δ* strain.  
144 The apparent  $K_m$  of *Glk1* was estimated in the *Cahxk2Δ/Δ* by subtracting the effect of  
145 *CaGlk4*. Data revealed that hexokinase 2 and glucokinase 1 have much lower  $K_m$  values ( $K_m$   
146  $104.87 \pm 7.05 \mu\text{M}$  and  $K_m$   $84.86 \pm 6.23 \mu\text{M}$ , respectively) than glucokinase 4 ( $K_m$   $3900 \pm 400$   
147  $\mu\text{M}$ ), using glucose as a substrate. The low glucose affinity of *CaGlk4* could partially explain  
148 the poor contribution of this protein to glucose and mannose phosphorylation.

149

### 150 ***CaHxk2* mostly sustains growth in the presence of hexoses**

151 Impact of hexokinase and glucokinase gene deletion on growth in the presence of hexoses  
152 was evaluated (Fig 2). Delayed growth of the hexokinase mutant *Cahxk2Δ/Δ* on glucose and  
153 mannose and severely impaired growth on fructose, confirmed the absence of a functional  
154 hexokinase. Slow growth on glucose and mannose was consistent with the presence of an  
155 additional glucokinase activity. The strong growth defect observed on fructose for this  
156 mutant confirmed the fact that fructose is phosphorylated by *CaHxk2* only. The residual  
157 growth observed on fructose could be due to the metabolism of the alternative carbon  
158 sources present in YPG. Growth of the mutant *Cahxk2Δ/Δ* was not affected in the presence  
159 of glycerol or galactose, substrates that are not phosphorylated by *CaHxk2*. This indicates  
160 that growth defects are linked to an impaired phosphorylation of hexoses. Moreover,  
161 growth of the complemented strain was comparable to the wild type. Altogether, these data  
162 clearly show that the hexokinase *CaHxk2* is necessary for proper growth in *C. albicans*.

163 Deletion of *CaGLK1* or both *CaGLK1* and *CaGK4* did not affect growth. Growth of  
164 the double mutant *Cahxk2glk1Δ/Δ* was drastically affected in the presence of glucose,



165 fructose and mannose. Growth failure was also observed, but less pronounced, in the  
166 presence of carbon sources that are not phosphorylated by hexokinase or glucokinase  
167 (galactose, lactate, glycerol). This strongly suggests that the presence of *CaGlk4* alone is not  
168 sufficient to sustain growth in the presence of hexoses and that the lack of both *CaHxk2* and  
169 *CaGlk1* could affect general physiological properties, beyond hexose phosphorylation in *C.*  
170 *albicans*.

171

172 **Glucokinases and hexokinase do not compensate at the transcriptional level,**  
173 **but exhibit functional redundancy at the protein level**

174 To highlight the respective role of hexokinase and glucokinases, *CaHXX2*, *CaGLK1* and  
175 *CaGLK4* expression was analyzed (Fig 3A). Due to the high level of homology of their coding  
176 sequences (98.6 % identity) it has not been possible to amplify *CaGLK1* transcripts alone.  
177 Therefore, the transcription level corresponded to the sum of *CaGLK1* and *CaGLK4*  
178 transcripts (indicated as *CaGLK1/4*). In the presence of glucose, *CaHXX2* was 3 times more  
179 expressed than *CaGLK1/4* (Fig 3A). Transcription of hexokinase and glucokinase genes was  
180 strongly induced by glucose (0.1% and 2%). In the presence of glucose, *CaHXX2* was 3 to 5  
181 times more expressed than *CaGLK1/4* (Fig 3A, B) . Contrary to glucokinase genes, the level of  
182 *CaHXX2* transcripts was dependent on the glucose concentration. Transcription of hexose  
183 kinase genes was also strongly induced by mannose and fructose. Surprisingly, the  
184 transcription of glucokinase genes was induced by fructose and glycerol which are not  
185 substrates for glucokinases (Fig 3B).

186 To better elucidate hexose kinase gene regulation, we examined their transcription  
187 after growth on 2% glucose in the different mutant strains (Fig 3C). Expression data  
188 confirmed an absence of transcripts in the corresponding gene-deleted strains and revealed

189 a complete restoration of the hexokinase transcription level after re-introduction of both  
190 wild type alleles. *CaHXX2* expression was not increased in the glucokinase mutants  
191 (*CaGlk1Δ/Δ*, *CaGlk1glk4Δ/Δ*). Likewise, *CaGLK1/4* gene expression was not increased in  
192 *Cahxk2Δ/Δ*. This suggests that unlike what happens in *S. cerevisiae* [33], no compensation  
193 mechanisms interfere to regulate glucokinases and hexokinase at the transcriptional level in  
194 the absence of one or the other gene. This points out different regulation pathways.  
195 However, this compensation could occur at the protein level since the double glucokinase  
196 mutant shows no hexose phosphorylation deficiency. Moreover, the fact that the level of  
197 *CaGLK1/4* transcripts was unchanged in the absence of the hexokinase (*Cahxk2Δ/Δ*) revealed  
198 that glucokinases genes are not subjected to glucose repression (Fig 3C). Interestingly, the  
199 level of *CaGLK4* expression, detected in *CaGlk1Δ/Δ* and *Cahxk2glk1Δ/Δ* was very low, just  
200 above the detection threshold. Considering that the glucokinase gene expression level  
201 detected in the mutant *Cahxk2Δ/Δ* is the sum of *GLK1* and *GLK4* transcripts, we can again  
202 assume that *CaGLK1* and *CaGLK4* are not equally expressed.

203 To investigate the expression of the enzymes, GFP-tagged CaHxk2 and CaGlc1 were  
204 detected in cell extracts by immunoblotting, after growth in the presence of glucose.  
205 CaHxk2-GFP and CaGlc1-GFP were detected whatever the glucose concentration. However,  
206 CaHxk2-GFP was much more abundant than CaGlc1-GFP (Fig 3D and 3E). This is consistent  
207 with the higher transcription level observed for *CaHXX2* but could also reflect a faster  
208 turnover for glucokinases. CaHxk2-GFP was equally detected in the presence of various  
209 carbon sources that are both inducers of its transcription and substrates of the enzyme, but  
210 also and in the presence of glycerol and lactate that do not induce *CaHXX2* transcription (Fig  
211 3B). This could be explained by the long half-life of CaHxk2. In addition to the lowest  
212 abundance of CaGlc1-GFP, the main difference between CaHxk2-GFP and CaGlc1-GFP

213 protein content was that *CaGlk1* was barely detectable in cell extracts after growth on  
214 lactate. This may again reflect different regulation processes for *CaHxk2* and *CaGlk1/4*.

215

## 216 **Hexokinase mediates glucose repression but not glucokinases**

217 To highlight the regulatory functions of *CaHxk2*, we constructed a *HXK2::GFP* strain (*CaHXK2-*  
218 *GFP*) expressing a functional *CaHXK2-GFP* from its own promoter, to examine the  
219 localization of *CaHxk2* in living cells exposed to glucose (Fig 4A). Upon growth in glucose (2%)  
220 the GFP signal was distributed in all the cell (except in the vacuole) with a strong  
221 accumulation into a structure that colocalize with the nucleus. This nuclear GFP signal was  
222 less important in cells grown in 0.1% glucose and nearly absent in cells grown without  
223 glucose (2% lactate) or at very low glucose concentration (0.05%). This indicates that, in *C.*  
224 *albicans*, *CaHxk2* is able to shuttle from the cytoplasm to the nucleus in presence of high  
225 glucose (0,1% and more). This observation is similar to what observed in *S. cerevisiae* grown  
226 in 2% glucose where *Hxk2* is known to accumulate into the nucleus where it exerts a  
227 transcriptional regulatory function necessary for glucose repression independent of its  
228 hexokinase activity [34,35].

229 To ascertain the impact of *CaHxk2*, *CaGlk1* and *CaGlk4* on glucose repression, we  
230 analyzed the expression of high affinity hexose transporter genes that are known to be  
231 controlled by the central repressor of the glucose repression pathway, *CaMig1*, in response  
232 to glucose [27,36] (Fig 4B). These transporter genes (*CaHGT7*, *CaHGT12*, *CaHXT10*) are also  
233 regulated by another main glucose sensing pathway, the SRR pathway, except *CaHGT8*  
234 which is not [20]. Hexose transporter gene expression was drastically enhanced (up to 10  
235 times for *CaHXT10*) in the hexokinase mutant after transfer on 2% glucose medium. On the  
236 contrary, *CaHGT7*, *CaHGT12* and *CaHXT10* expression level was either lowered in the double

237 glucokinase mutant or unaffected in the case of *CaHGT8*. These data suggest that *CaHxk2*  
238 but not glucokinases, could have a repressor function on hexose transporter gene  
239 expression. Moreover, SRR-dependent transporter genes expression in the glucokinase  
240 mutant may suggest an unexpected regulatory role for glucokinase in transporter gene  
241 expression.

242

243 **Hexose kinase enzymes mediate protection during harmful environmental**  
244 **challenges: glucokinase contributes to the hypoxic response**

245 In *C. albicans* and a number of yeasts, one strategy to counteract oxidative and osmotic  
246 stresses is the rapid endogenous synthesis of compatible solutes or, under exposure to cell  
247 wall stresses, cell wall biogenesis [37,38]. These stress responses which are directly or  
248 indirectly linked to glucose metabolism, could have been affected in the hexose kinase  
249 mutants. For that purpose, wild type and mutant strains were grown in the presence of 2%  
250 glucose (YPG) supplemented with 1.2 M KCl (osmotic stress), 5 mM H<sub>2</sub>O<sub>2</sub> (oxidative stress),  
251 0.05% SDS and 5 mM caffeine (cell wall stresses). Data presented Fig. 5A revealed that all  
252 stresses had an impact by decreasing growth of the hexokinase mutants (*Cahxk2Δ/Δ*,  
253 *Cahxk2glk1Δ/Δ*). On the opposite, single and double glucokinase mutant strains were not  
254 significantly susceptible to the applied stresses. This suggests that *Cahxk2* is involved in  
255 stress responses through its central metabolic position.

256 During host infection, *C. albicans* colonizes multiple niches that greatly differ in  
257 oxygen content, meaning that it is adapted to hypoxic environments. Growth of the wild  
258 type and mutant strains under hypoxic conditions revealed the impact of *CaHxk2* deletion  
259 (Fig 5B). Growth of *Cahxk2Δ/Δ* and *Cahxk2glk1Δ/Δ* was affected by 50% after 24 h, as  
260 compared to normoxia while the deletion of one or two glucokinases had minor or no

261 effects. The transcriptional response to hypoxia, elucidated in *C. albicans*, revealed a global  
262 upregulation of glycolytic genes [39,40]. This prompted us to investigate the expression of  
263 hexokinase and glucokinase in response to hypoxia (Fig 5C). After one hour of exposure,  
264 *CaGLK1/4* transcript level increased by a factor of 25, while *CaHXK2* upregulation was much  
265 less detectable. This shows that glucokinases and hexokinase transcription is differently  
266 regulated by hypoxic conditions. This was confirmed at the protein level. GFP-tagged  
267 hexokinase was equivalently detected in normoxia and hypoxia. In contrast, immunoblot of  
268 *CaGlc1*-GFP revealed a constant amount of protein in response to hypoxia that persisted  
269 along the growth, while in normoxia, the amount of *CaGlc1*-GFP detected clearly decreased  
270 (Fig 5D).

271

## 272 **Hexose phosphorylation by *CaHxk2* is necessary to filamentation**

273 As glucose is one of the several stimuli that can trigger yeast-to-hypha development in *C.*  
274 *albicans* [41,42], we checked the ability of hexokinase and glucokinase mutants to undergo a  
275 yeast-to-hyphae morphological transition. To evaluate the impact of the hexose  
276 phosphorylation step on filamentation, hyphal formation was induced by growth on  
277 different media containing known inducing carbon sources, requiring or not hexose kinase  
278 enzymes for further metabolization. Spider and serum media, contain respectively mannitol  
279 and glucose that depends upon the hexose kinase step to be metabolized. The third medium  
280 contains *N*-acetylglucosamine, that do not require *CaHxk2*, *CaGlc1* or *CaGlc4* to be  
281 metabolized, but require *CaHxk1* [24,25]. After two days of growth at 37°C on serum and  
282 spider media, the wild type, *CaHXK2* complemented strain and glucokinase mutants showed  
283 abundant filaments at the periphery of the colony, while the hexokinase mutants  
284 (*CaHxk2Δ/Δ*, *CaHxk2glk1Δ/Δ*) produced hyphae-deficient colonies (Fig 6A). Morphological

285 changes were also observed at the cell level. Microscopic observations revealed a drastically  
286 decreased proportion of filamentous structures for the hexose kinase mutant cells,  
287 suggesting that the hexokinase *CaHXX2* is necessary to the yeast-to-hyphae transition. By  
288 contrast, filamentation of the *Cahxk2Δ/Δ* hexokinase mutant was not affected during growth  
289 in the presence of *N*-acetylglucosamine. All strains behave similarly except the double  
290 mutant *Cahxk2glk1Δ/Δ*, which appeared hypofilamentous. This suggests that hexose  
291 phosphorylation by *CaHxk2* could be an essential step for filamentation. Moreover,  
292 filamentation defect of the double mutant *Cahxk2glk1Δ/Δ* grown on *N*-acetylglucosamine  
293 could be the consequence of severe physiological disturbances.

294 To eventually highlight a specific role in pathogenic behaviour for *C. albicans* hexose  
295 kinases, we compared hexokinase and glucokinase gene expression levels during the early  
296 steps of the morphological switch. Our data did not reveal any particular transcriptional  
297 response of one gene or another (Fig 6B). Both profiles revealed a two-time increase of  
298 transcripts 30 or 60 min after the initiation of the filamentation by serum and a shift at 37°C.  
299 However, after one hour of growth, glucokinases expression continues to increase while  
300 *CaHXX2* transcription level decreases after 30 min.

301

### 302 ***Cahxk2* mutant is hypovirulent in *Galleria mellonella* and macrophage models**

303 To explore the impact of altering hexokinase and glucokinases on *C. albicans* virulence, we  
304 examined first the survival rate of the host model *G. mellonella* following infection with the  
305 wild type, mutant and complemented strains (Fig 7A). *G. mellonella* survival data indicated  
306 that there was a statistically significant difference between the survival rate of larvae  
307 infected by the mutants and the wild type strains, except for the *Caglk1Δ/Δ* single mutant.  
308 Seven days post infection, 100% of the larvae were killed by the wild type strain while the

309 survival of the larvae infected by *Cahxk2Δ/Δ* and *Cahxk2glk1Δ/Δ* was still 70% and 85%,  
310 respectively. The double glucokinase mutant was also significantly less virulent than the wild  
311 type strain, with an intermediary survival rate of 50%. The *Cahxk2Δ/Δ c/c* complemented  
312 strain revealed a partially restored virulence.

313 Secondly, we analysed the ability of the mutant to kill macrophages at different  
314 interaction times using an *in vitro* model assay (Fig 7B). Hexokinase and glucokinase gene  
315 deletions did not modify macrophages association with yeast for any strains, except for the  
316 *Cahxk2glk1Δ/Δ* double mutant which shows a slightly decreased number of recruited  
317 macrophages at the early time of infection (60% compared to approximately 80% for the  
318 other strains). This suggests that the absence of hexokinase or glucokinase has no impact on  
319 the recognition step. Survival of macrophages was severely enhanced when *Cahxk2Δ/Δ* and  
320 *Cahxk2glk1Δ/Δ* were tested. After 4 hours in the presence of the hexokinase mutant  
321 (*Cahxk2Δ/Δ*) the number of alive macrophages was nearly twice as high as in the presence of  
322 the wild type strain. Moreover, 90% of the macrophages infected by *Cahxk2glk1Δ/Δ* were  
323 still alive after 4 h, while 34% survived with the wild type strain. After 24 hours, 39% of the  
324 macrophages infected with *Cahxk2glk1Δ/Δ* survived, compared to only 2% with the wild  
325 type strain and 1% for the other strains. This underlines again the very affected virulence  
326 capacities of this double mutant. Reintegration of the wild type *CaHXX2* gene restored the  
327 killing capacities, suggesting that the virulence defect was linked to the absence of *CaHXX2*.  
328 As compared to the wild type strain, interactions performed with glucokinase mutants  
329 (*Caglk1Δ/Δ*, *Caglk1glk4Δ/Δ*) and macrophages did not reveal significant differences. Because  
330 the process of macrophage killing relies on the formation that pierce the phagocytic  
331 membrane, the morphogenesis of the strains was analysed at 4 and 24 h post infection (Fig  
332 7C). Our data clearly reveal that *Cahxk2Δ/Δ* and *Caglk1glk4Δ/Δ* did not develop hyphae

333 during macrophage infection. In order to make sure that the growth defect of the  
334 hexokinase mutant strains was not the main cause for avirulence, *C. albicans* cells were  
335 released from macrophage after 4 hours of phagocytosis by cell lysis and counted (S1 Fig). As  
336 compared to the wild type, there was no significant differences in the capacity of the mutant  
337 strains to divide inside the macrophage.

338 Altogether, these data suggest that the virulence defect associated to the deletion of *CaHxk2*  
339 could concern the fungal escape phase rather than the recognition and initial phagocytosis  
340 steps.

341

## 342 **Discussion**

343 In this study, we sought to assign functions to the hexokinase and glucokinases that could  
344 potentially contribute to the fitness and virulence of *C. albicans*. We showed that hexose  
345 phosphorylation is mostly assured by *CaHxk2*, which mainly sustains *in vitro* growth in the  
346 presence of hexoses. Hexokinase expression is induced by glucose and higher than  
347 glucokinase expression. But proteins are both detectable even in the absence of any  
348 phosphorylable hexose. As shown for *S. cerevisiae* glycolytic enzymes, regulation is the result  
349 of a complex mixture of gene expression and metabolic effects, in order to optimize  
350 simultaneously fluxes, protein and metabolite concentrations [43]. *C. albicans* inhabits  
351 niches containing contrasting carbon sources. Metabolic flexibility implies that alternative  
352 carbon sources and glucose are assimilated simultaneously [9]. The discrepancy between *C.*  
353 *albicans* transcriptome and proteome has been already clearly highlighted [44]. Upon  
354 glucose exposure, *CaIcl1* and *CaPck1*, enzymes involved in the assimilation of alternative  
355 carbon sources are not degraded, while their transcripts are subjected to glucose repression.  
356 We can assume that a persistent level of *CaHxk2*, *CaGlk1* and *CaGlk4* could promote



357 metabolic flexibility and stress response to cope with changing microenvironments reached  
358 by the pathogen in the various host niches.

359 The affected growth profiles of *Cahxk2Δ/Δ* and *Cahxk2glk1Δ/Δ* indicates the limited  
360 ability of *CaGlk1* and *CaGlk4* to allow glucose utilization in the absence of *CaHxk2*, while  
361 normal growth was observed in the absence of *CaGlk1* and/*CaGlk4*. One possible hypothesis  
362 would be a limited glucose uptake caused by the absence of hexokinase. Hence, in *S.*  
363 *cerevisiae* and *K. lactis* glycolytic mutants, glycolysis controls glucose signalling via the SRR  
364 pathway. The expression of several glucose-regulated genes, like hexose transporter genes,  
365 depends on a functional glycolysis, limiting therefore glucose import [45]. However, this  
366 control does not seem to exist in *C. albicans* (Fig. 3C). On the contrary, expression of  
367 transporter genes controlled by the SRR pathway (*HGH12*, *HGT7*, *HXT10*) was enhanced in  
368 the hexokinase mutant *Cahxk2Δ/Δ*. Therefore, the poor expression of glucokinase genes, the  
369 low intracellular concentration of *CaGlk1* and *CaGlk4* and their low participation in hexose  
370 kinase activity, could mainly explain the growth defect in the absence of hexokinase.  
371 Moreover, glycolysis constitutes an interface between metabolism and gene transcription.  
372 For instance, glycolysis yields pyruvate which can be oxidized into acetyl-CoA, directly  
373 implicated in histone acetylation and gene expression. In stationary yeast cells, increase  
374 glucose availability leads to higher levels of acetyl-CoA synthesis, global histone acetylation,  
375 accompanied by the induction of a thousand of growth-related genes [46]. The reduced  
376 glycolytic flux of the hexokinase mutant could therefore lead to transcription defects and  
377 slower growth. In all the tested conditions, the double mutant *Cahxk2glk1Δ/Δ* presented an  
378 altered phenotype. In this context, *CaGlk4* is the only hexose kinase enzyme present.  
379 Because of the low affinity of *CaGlk4* for glucose and its very low expression, growth of  
380 *Cahxk2glk1Δ/Δ* is drastically affected in the presence of hexoses. This could be explained by

381 the lack of efficient hexose kinase enzymes. Moreover, hexokinase and glucokinase gene  
382 deletions could lead to several drastic intracellular changes. In *S. cerevisiae*, the *hvk2* mutant  
383 has a higher H<sup>+</sup>-ATPase activity and a lower pyruvate decarboxylase activity which coincided  
384 with an intracellular accumulation of pyruvate [47]. Absence of glucose repression, could  
385 also contribute to redirect carbon flux. In *K. lactis*, the identification of hexokinase-  
386 dependent proteins related to chromatin remodeling, amino acids and protein metabolism,  
387 redox maintenance and stress response reinforces the idea that glucose kinase enzymes  
388 exert broader functions than hexose phosphorylation and glucose repression [48].

389 Our findings reveal that the well-established bifunctional functions of Hvk2 in *S.*  
390 *cerevisiae* [22,49] also exists in *C. albicans*, while glucokinases do not seem to play a role in  
391 glucose repression. We detected CaHvk2-GFP in the nuclei in 0.1% glucose-grown cells (5  
392 mM), which corresponds to the glucose level maintained in the bloodstream and in vaginal  
393 secretions [7,9]. Glucose repression pathway via CaHvk2, could thereby promote metabolic  
394 adaptation to favor the fitness of the pathogen, even in glucose-limited host niches. In  
395 response to glucose and according to the *S. cerevisiae* model, CaHvk2 should act as a  
396 transcriptional carbon catabolite corepressor binding to CaMig1 [50]. *C. albicans* has two  
397 orthologs of ScMig1, CaMig1 and CaMig2 but, to our knowledge, no functions have been  
398 assigned yet to CaMig2. Transcriptional studies realized on CaMig1 revealed that it regulates  
399 a unique set of genes, annotated as carbohydrate uptake and catabolism factors [51].  
400 However, works conducted on CaMig1 revealed that it has no phosphorylation sequence for  
401 the kinase CaSnf1, essential for the removal of glucose repression [27,52]. Deletion of  
402 CaMig1 has no effect on the expression of *CaGAL1*, a glucose repressed gene [27] but  
403 impacts the transcription of hexose transporter genes [53]. Moreover, CaMig1 has been  
404 recently implicated in the resistance to weak organic acids, a novel function [54]. All these

405 evidences show that some of the molecular mechanisms involved in glucose repression in *C.*  
406 *albicans* remain to be elucidated, in particular concerning the direct partners of *CaHxk2*.  
407 Moreover, contrary to *S. cerevisiae* [33] *C. albicans* glucokinases are not subjected to glucose  
408 repression. This suggests that glucokinases are not involved into the control of glucose  
409 phosphorylation in *C. albicans* and underline their minor role in glucose metabolism.

410         Contrary to glucokinases, hexokinase gene deletion had an impact on various *in vitro*  
411 stress responses. Glucose has been shown to promote stress resistance and to induce some  
412 stress genes in *C. albicans* [55]. Our data support this finding, but furthermore indicate a role  
413 for glucose phosphorylation in stress resistance. Osmotic and oxidative stresses induce  
414 storage of trehalose, glycerol and arabinol [38]. Biosynthesis of such osmolyte sugars and  
415 polyols, directly connected to the upper part of the glycolytic pathway, depends on glucose-  
416 6-phosphate availability. This was confirmed in *S. cerevisiae* where the analysis of metabolic  
417 fluxes in a  $\Delta h x k 2$  mutant revealed a synthesis of glycerol reduced by a factor of 4.5 [56].  
418 Moreover, the carbon source modulates cell wall architecture and strongly influences the  
419 resistance of *C. albicans* to osmotic and cell wall stresses. Glucose and lactate-grown cells  
420 display significant differences in cell wall elasticity and ultrastructure [8].  $\beta$ -glucans are  
421 major constituents of *C. albicans* cell wall. Glucan synthases assemble UDP-glucose residues  
422 produced from phosphorylated glucose [57]. Thus, any hexose phosphorylation defect  
423 would affect the cell wall and render it more sensitive to stress.

424         Glycolytic gene expression has been associated to the global response of *C. albicans*  
425 to hypoxia [58]. Several transcription factors are involved in hypoxia-responsive expression  
426 of glycolytic genes. Among them, the key filamentation regulator Efg1 and the transcription  
427 factors Tye7 and Gal4 contribute to the early hypoxic response [11,17,39,40]. Contrary to *S.*  
428 *cerevisiae* which ferments sugars even under aerobic conditions, *C. albicans*, a Crabtree-

429 negative yeast, ferments carbohydrates under hypoxic conditions [59]. Our findings specify a  
430 clear and drastic effect of hypoxia on glucokinase expression at the mRNA and protein levels.  
431 Glucokinase enzymes could be part of the global early hypoxic response, as a spare wheel, to  
432 maintain a necessary glycolytic flux during fermentation conditions in oxygen-poor niches.  
433 Moreover, this data confirms the fact that hexokinase and glucokinases are not targeted by  
434 the same regulatory pathways.

435         Our results show that the hexokinase mutant retains the filamentation capacity when  
436 the carbon source does not require *CaHxk2* to be assimilated. Thus, the filamentation-  
437 defective phenotype of the hexokinase mutant could be linked to a phosphorylation defect.  
438 The absence of one or both glucokinases has no impact on filamentation. This could be  
439 related to their low contribution to hexose phosphorylation and, concerning the spider  
440 medium, because glucokinases do not phosphorylate fructose. The activities of several major  
441 glycolytic enzymes are known to differ in yeast and hyphal forms [60]. We have shown that  
442 induction of the filamentation requires upregulation of hexose kinase genes. Morphological  
443 switch to filamentous growth requires energy and carbon source, notably to build  
444 membranes and cell walls. Thereby, several links between morphogenesis and expression of  
445 metabolic genes are established in *C. albicans*. The transcription factor Efg1, part of a Ras-  
446 cAMP-PKA signaling network and involved in morphogenesis in *C. albicans*, strongly induces  
447 glycolytic and fermentation genes [61]. Moreover, mutants of the *CaHgt4/CaRgt1* pathway  
448 (SRR pathway) involved in the control of gene expression in the absence of glucose display  
449 affected filamentation phenotypes [20,36]. Thus, nested pathways control simultaneously  
450 morphogenesis, glucose signalization and metabolism and by this way *CaHxk2*, which  
451 directly impacts on filamentation through its kinase activity.

452           The hypovirulence of the hexokinase mutant suggests a central function for *CaHxk2*.  
453 We have shown that the glucose phosphorylation step controls filamentation. Morphological  
454 switch is a determining factor of virulence in both *Galleria* and macrophage models. Hyphae  
455 are observed in the *G. mellonella* infected tissues [62]. Histological investigations of infected  
456 larvae revealed that the SC5314 wild type strain shows a high propensity to filament, leading  
457 to gut invasion [63]. Time-lapse microscopy studies have shown a strong correlation  
458 between intra-phagocytic hyphal growth and macrophage lysis [64]. Numerous experimental  
459 data support a model by which *C. albicans* hyphae enable escape from phagocytes by  
460 growing and consequently lysing the cell [65]. *CaHxk2* could then be required to sustain  
461 hyphal growth within the host cell. Moreover, the impact could be situated at the metabolic  
462 level. *C. albicans* hexokinase mutant could degrade trehalose, major hemolymph sugar in *G.*  
463 *mellonella* larvae [66] to recover glucose, but remain unable to phosphorylate it. Recently,  
464 Tucey et al., [67] revealed concomitant up-regulation of host and pathogen glycolysis,  
465 setting up glucose competition by depleting glucose. *C. albicans*-activated macrophages shift  
466 to Warburg metabolism and become dependent on glucose for survival. During macrophage  
467 infection, both *C. albicans* free cells and escaped from macrophage could trigger rapid death  
468 to the phagocytes by depleting glucose levels. The hexokinase mutant could not compete  
469 efficiently for glucose and then turn out to be hypovirulent.

470           Our data decipher the role of glucose kinase enzymes, not only as a central point of  
471 metabolism, but also as actors in regulation, stress response and morphogenesis.  
472 Altogether, those different interconnected functions influence the virulence of the yeast.  
473 Surprisingly, while the lack of glucokinases did not impact on the phenotype of the mutants,  
474 *CaGlc1* clearly appeared implicated in the hypoxic response. Moreover, the fact that hexose  
475 transporter gene expression level is affected in *Cagl1g1k4Δ/Δ* suggests that glucokinases

476 could be implicated in regulation processes that remain to be elucidated. Future research  
477 might provide further insights in this challenging area.

478

## 479 **Methods**

### 480 **Strains and media**

481 *C. albicans* strains used in this study are listed in S2 Table. Strains were grown at 30°C or  
482 37°C on YPG medium (1% yeast extract, 2% peptone, 2% glucose). When necessary glucose  
483 was added at various concentrations (from 0.01 to 2%) or replaced by other carbon sources  
484 like 2% glycerol or 2% lactate. For filamentation assays, *C. albicans* cells were grown for 48 h  
485 at 37°C on Spider medium (1% Nutrient Broth, 1% mannitol, 0.2% KH<sub>2</sub>PO<sub>4</sub>, 2% agar) or 96 h  
486 on YP medium (1% yeast extract, 2% peptone) supplemented with 2.5 mM N-acetyl-  
487 glucosamine. Five percent calf serum was also used to induce the morphological switch at  
488 37°C after a 2 to 5 days incubation period. The utilization of different carbon sources and  
489 sensitivity to different compounds (5 mM H<sub>2</sub>O<sub>2</sub>, 1.2 M KCl, 0.05% SDS, 5 mM caffeine) was  
490 monitored in liquid YPG at 30°C by spectrophotometry (Tecan Infinity 200 Pro Serie). Five ml  
491 of YPG inoculated with stationary phase cells were cultivated to an optical density at 600  
492 (OD<sub>600</sub>) = 0.6. Ten µl of culture were used to inoculate 180 µl of YP medium containing  
493 different carbon sources or the required additives distributed in the wells of a plate. Controls  
494 lacking carbon source or specific compounds were performed. Plates were sealed with gas-  
495 permeable plastic film. OD<sub>600</sub> was measured every 30 min during 48 h, with shaking at 380  
496 rpm. Growth data are based on three independent experiments, each of which consisted of  
497 assays performed in triplicate. For growth under hypoxic conditions, aerated flasks were  
498 inoculated with an overnight culture of *C. albicans*, to OD<sub>600</sub> of 0.2. Cells were grown until  
499 the beginning of the exponential phase (OD<sub>600</sub> ≈ 1.8). Hypoxic conditions were created by

500 collecting and transferring cells suspension in hermetic and filled tubes. Different time points  
501 following the shift from normoxic to hypoxic growth conditions were considered (30, 60, 90  
502 and 120 min). After appropriate time, cells were collected by centrifugation at 3,000 rpm for  
503 5 min, washed twice with sterile water and rapidly frozen at -80°C. For each time point,  
504 three biological replicates were performed. For growth in 96-well plates, anoxic condition  
505 were generated by adding 50 µl of mineral oil in each well.

506

### 507 **Construction of mutant strains**

508 Mutant strains used in this study are listed in S2 Table. Mutant strains were constructed  
509 using the *SAT1* flipper selection cassette kindly provided by J. Morschhäuser [32]. *CaHXX2*  
510 homozygous mutant strain and the complemented strain *Cahxk2Δ/Δc/c* were generated  
511 according to methods described by Reuß et al., [32]. The *Caglk1Δ/Δ* and *Caglk1glk4Δ/Δ*  
512 homozygous null mutant strains were constructed by one step cloning-free fusion PCR-based  
513 strategy. The *Cahxk2glk1Δ/Δ* mutant strain was constructed by deleting successively both  
514 *CaHXX2* alleles of the *Caglk1Δ/Δ* mutant using the *CaHXX2* deletion cassette (S1 Appendix).  
515 *CaHxk2* and *CaGlk1* GFP epitope tagging was performed using a PCR-based strategy using  
516 pGFP-NAT1 as a template (kindly provided by S. Bates) [68]. The appropriate mutants were  
517 identified by PCR analysis using a combination of primers outside the sites of cassette  
518 integration and internal primers.

519

### 520 **Yeast transformation**

521 *C. albicans* transformation was performed using the PEG Lithium technique [69]. After  
522 transformation, mixtures were incubated in YPG for 4 h at 30°C and then plated on YPG +  
523 nourseothricin 250 µg/ml (Werner BioAgent, Jena, Germany). Nourseothricin-sensitive cells

524 were obtained according to Reuß et al., [32]. Transformants were grown overnight in YPG  
525 medium without selective pressure. Cells were plated on YPG containing nourseothricin (25  
526 µg/ml). Small colonies containing nourseothricin-sensitive cells were selected after 2 days of  
527 growth at 30°C. Both alleles were disrupted or complemented in a similar manner after  
528 elimination of the *SAT1* flipper cassette. In the case of *in vivo* epitope tagging using pGFP-  
529 NAT1 (S3 Table) it was not possible to eliminate the *NAT1* marker, one allele was modified  
530 by transformation, only.

531

### 532 **Yeast cell extract and immunoblotting**

533 To prepare proteins extracts, cells were centrifuged and suspended in 500 µl of 0.1 M Tris-  
534 HCl buffer supplemented with 10% PMSF (Phenylmethylsulfonyl fluoride). 1.5 ml of glass  
535 beads were added and proteins were extracted using FastPrep®-24 (MP Biomedicals). A  
536 succession of five grinding (6.5 m/s for 30 sec) was performed. Following this lysis step, cell  
537 extracts were centrifuged at 1,500 rpm for 10 min at 4°C. Proteins from the supernatant  
538 were quantified using Nanodrop 2000®.

539 Immunodetection conditions were as described by Rolland *et al.*, [70]. The  $\alpha$ -GFP  
540 antibody (monoclonal anti-mouse, Roche) and secondary antibody (mouse antibody, HRP  
541 conjugated, Bethyl Laboratories) mouse HRP were used at 1/5000<sup>e</sup> and 1/10000<sup>e</sup> final  
542 concentration respectively.

543

### 544 **Determination of hexose kinase activity**

545 Either glucose, fructose or mannose were used as substrates. The hexokinase II activity was  
546 measured spectrophotometrically through NADP<sup>+</sup> reduction in a glucose-6-phosphate  
547 dehydrogenase-coupled reaction. Each reaction was performed in 1 mL spectrophotometer



548 cuvette at room temperature. The final assay mixture consisted of 100  $\mu$ l of 25 mM HEPES  
549 buffer pH 7.5, 100  $\mu$ l of 10 mM MgCl<sub>2</sub>, 100  $\mu$ l of 1 mM  $\beta$ -NADP, 500  $\mu$ g of crude proteins  
550 extract, 2 units of Glucose-6-phosphate dehydrogenase and (i) 100  $\mu$ l of 10 mM D-Glucose  
551 for glucose kinase activity, (ii) 2 units of phosphoglucose isomerase and 100  $\mu$ l of 10 mM D-  
552 Fructose for fructokinase activity, (iii) 2 units phosphomannose isomerase, 2 units of  
553 phosphoglucose isomerase, and 100  $\mu$ l of 10 mM D-Mannose for mannokinase activity.  
554 Reactions were started with the addition of 100  $\mu$ l of 5 mM ATP. Absorbance was  
555 continuously recorded at 340 nm, for 10- or 15-min. Activities are obtained from the mean  
556 of three independent experiments and expressed as a percentage of the activity obtained  
557 with wild type crude protein extract. The apparent Km of crude extracts of the glucose  
558 kinases were determined with a final ATP concentration of 5 mM, a final concentration of  
559 glucose ranging from 1  $\mu$ M to 100 mM. The NADPH apparition at 340 nm was measured  
560 using a Tecan Infinite M200 (Salzburg, Austria) microtiter plate reader at 30°C. A single well  
561 is composed of 10  $\mu$ l Glucose-6-P dehydrogenase (0.2 U/mL), 10  $\mu$ l of 1 mM NADP<sup>+</sup>, 10  $\mu$ l of  
562 10 mM MgCl<sub>2</sub>, 10  $\mu$ l of HEPES buffer (25 mM, pH 7.6) and 50  $\mu$ g of crude extracts. The  
563 reaction was initiated by the addition of 10  $\mu$ l of ATP (5 mM in potassium HEPES buffer). The  
564 activity was determined using a calibration curve of NADH in the range of 0-500  $\mu$ M to  
565 consider the variability of the optical pathway. The parameters were obtained using Dynafit  
566 software and the rapid equilibrium approximation of the Michaelis-Menten equation [71].

567

### 568 **GFP detection by Microscopy**

569 Yeast strain expressing the *CaHxk2::GFP* and *CaGlk1::GFP* fusion proteins were grown to  
570 exponential phase (OD<sub>600</sub>  $\approx$  0.8) in YP containing 0.05, 0.1 or 2% glucose or 2% lactate. Nuclei  
571 were stained by addition of DAPI to 10  $\mu$ g/ml to the cultures and incubated at 28°C, 180 rpm

572 for 60 min. Cells were washed twice with phosphate buffer saline (PBS) (10 mM Na<sub>2</sub>HPO<sub>4</sub>,  
573 1.76 mM KH<sub>2</sub>PO<sub>4</sub>, 137 mM NaCl, and 2.7 mM KCl), collected by centrifugation and  
574 resuspended in 20 µl of PBS. GFP and DAPI localization were monitored in live cells cultures  
575 using a Zeiss Axioskop 2 Plus fluorescence microscope. Images were taken with a Zeiss  
576 AxioCam MR camera using AxioVision software and processed using LiveQuartz Images  
577 Editor.

578

### 579 **RNA extraction and RT-q-PCR analysis**

580 Total RNA was extracted from cells grown to OD<sub>600</sub> ≈ 1.5 by the acid phenol method [72]. For  
581 reverse transcription-quantitative PCR (RT-qPCR) experiments, 10 µg of total RNA extract  
582 were treated with DNase I (Ambion). Then, ReVertAid H Minus reverse transcriptase  
583 (Thermo Scientific), was used as described by the manufacturer, to generate cDNAs. RT-  
584 qPCR experiments were performed with the CFX 96 Bio-Rad light cycler using SsoAdvanced  
585 Universal SYBR Green Supermix (Bio-Rad). Relative quantification was based on the  $2\Delta\Delta CT$   
586 method using *CaACT1* (actin) as calibrator. The amplification reaction conditions were as  
587 follows: 95°C for 1 min, 40 cycles of 95°C for 15 s, 60°C for 30 s, and the final step 95°C for 10  
588 s. A melting curve was generated at 95° for 10 s, 65°C for 5 sec with an increment of 0.5 °C  
589 until 95°C at the end of each PCR cycle, to verify that a specific product was amplified.

590

### 591 **Infection of *G. mellonella* larvae**

592 For *G. mellonella* infection, overnight cultures of WT (SC5314), mutant or complemented  
593 strains of *C. albicans* were grown to stationary phase (OD<sub>600</sub> = 5) in 2% YPG medium. Cells  
594 were centrifuged and washed three times with 0.9% NaCl. Larvae were infected with 10 µl of  
595 suspension (2.5 x 10<sup>5</sup> cells) injected using a Hamilton syringe, between the third pair of

596 prothoracic legs. Three replicates, each consisting of 10 insects, were carried out with  
597 survival rates measured daily for a period of 8 days. Infected larvae were incubated at 37°C  
598 in the dark. A control group injected with 10 µl of 0.9% NaCl was included. Death was  
599 determined based on the lack of motility and melanisation. Survival curves were plotted and  
600 their statistical significance were determined by Kaplan-Meier analysis using the GraphPad  
601 Prism 6.0 program. *P* values were estimated using Log rank tests.

602

### 603 **Infection of phagocytes with yeasts**

604 Macrophages from the J774A.1 (ATCC TIB-67) murine cell line were infected as previously  
605 described [73] in cRPMI medium (RPMI-1640 without phenol red and supplemented with  
606 10% heat-inactivated fetal bovin serum, 1 mM sodium pyruvate and 2 g/L sodium  
607 bicarbonate) at 37°C under 5% CO<sub>2</sub>. Briefly, 2 x 10<sup>5</sup> macrophages per well were adhered  
608 overnight in 96-well plates, and infected with 1 x 10<sup>6</sup> Calcofluor White (CFW)-labeled yeast  
609 cells in stationary phase in cRPMI medium supplemented with 5 µg/mL CFW. Interaction was  
610 followed over a 24-hour time course experiment. To count yeasts after phagocytosis (S1 Fig),  
611 macrophages were infected with *C. albicans* strains as described in Materials and Methods,  
612 using 10 macrophages to 1 yeast Multiplicity Of Infection (MOI). After 4 hours of interaction,  
613 infected macrophages were collected after trypsin treatment, centrifuged for 10 min at  
614 10000 X g, and lysed in 1 ml of 0.2% ice-cold Triton X-100. Released yeast cells were  
615 resuspended in YPD and counted using Kova slides (Kova International). Triplicates were  
616 done for each experiment. The results are shown as the average of five  
617 independent experiments +- standard errors.

618

### 619 **Flow Cytometry analysis**

620 Flow Cytometry assays were conducted as previously described [73] using a FACSCantoll  
621 (Becton Dickinson). Macrophage viability and the ratio of macrophages engaged in  
622 phagocytosis were determined after 30 min, 4 h and 24 h of infection with CFW-labeled  
623 yeasts. Quintuplets of each condition were done for each experiment. After trypsin  
624 treatment, macrophages were labeled with 0.2 µg/mL anti-mouse CD16-APC (a membrane  
625 stain) and 0.2 µM calcein-AM (Sigma) (a marker of active metabolism). The percentage of  
626 macrophage viability was calculated using the number of macrophages positive for both  
627 fluorescence (anti-CD16-APC and calcein-AM) when infected with yeasts compared to the  
628 control uninfected macrophages. Phagocytosing macrophages were quantified as the  
629 percentage of the double-stained macrophages also positive for CFW fluorescence. *t*-test  
630 was used to establish statistical significance with a significance level set at  $P < 0.05$ .

631

### 632 **Statistical analysis**

633 Experiments were performed at least three times independently. All statistical data were  
634 calculated with GraphPad Prism 7 software. For comparisons of multiple groups one-way  
635 ANOVA method was used. Significance of mean comparison is annotated as follow: ns, not  
636 significant; \* $P = 0.033$ ; \*\* $P = 0.002$ ; \*\*\* $P = 0.0002$ ; \*\*\*\* $P < 0,0001$ .

637

### 638 **Acknowledgements**

639 We are grateful to Jade Ravent for technical assistance. We thank J. Morschhäuser and S.  
640 Bates for providing the pSFS2A and pGFP-NAT1 plasmids, respectively. The RT-qPCR  
641 experiments were performed thanks to the DTAMB (Développement de Techniques et

642 Analyse Moléculaire de la Biodiversité, Université Lyon1). Romain Laurian was the recipient  
643 of a fellowship from the Ministère de la Recherche of France.

644

## 645 **References**

- 646 1. Odds, F C. *Candida and Candidosis*. 2<sup>nd</sup> ed. London: Bailliere Tindal; 1988.
- 647 2. Calderone, R. A. & Clancy, C. J. *Candida and candidiasis*. 2<sup>nd</sup> ed. Washington: ASM  
648 Press; 2012.
- 649 3. Perleth J, Choi B, Spellberg B. Nosocomial fungal infections: epidemiology, diagnosis,  
650 and treatment. *Med Mycol*. 2007;45: 321–346.
- 651 4. Jarvis WR, Martone WJ. Predominant pathogens in hospital infections. *J Antimicrob*  
652 *Chemother*. 1992;29: 19–24.
- 653 5. Armstrong-James D, Meintjes G, Brown GD. A neglected epidemic: fungal infections  
654 in HIV/AIDS. *Trends Microbiol*. 2014;22: 120–137.
- 655 6. Noble SM, Gianetti BA, Witchley JN. *Candida albicans* cell-type switching and  
656 functional plasticity in the mammalian host. *Nat Rev Microbiol*. 2017;15: 96–108.
- 657 7. Brown AJP, Brown GD, Netea MG, Gow NAR. Metabolism impacts upon *Candida*  
658 immunogenicity and pathogenicity at multiple levels. *Trends Microbiol*. 2014;22:  
659 614–622.
- 660 8. Ene IV, Adya AK, Wehmeier S, Brand AC, MacCallum DM, Gow NAR, et al. Host  
661 carbon sources modulate cell wall architecture, drug resistance and virulence in a  
662 fungal pathogen. *Cell Microbiol*. 2012;14: 1319–1335.

- 663 9. Barelle CJ, Priest CL, Maccallum DM, Gow NAR, Odds FC, Brown AJP. Niche-specific  
664 regulation of central metabolic pathways in a fungal pathogen. *Cell Microbiol.*  
665 2006;8: 961–971.
- 666 10. Ene IV, Cheng S-C, Netea MG, Brown AJP. Growth of *Candida albicans* cells on the  
667 physiologically relevant carbon source lactate affects their recognition and  
668 phagocytosis by immune cells. *Infect Immun.* 2013;81: 238–248.
- 669 11. Bonhomme J, Chauvel M, Goyard S, Roux P, Rossignol T, d’Enfert C. Contribution of  
670 the glycolytic flux and hypoxia adaptation to efficient biofilm formation by *Candida*  
671 *albicans*. *Mol Microbiol.* 201;80: 995–1013.
- 672 12. Lorenz MC, Fink GR. The glyoxylate cycle is required for fungal virulence. *Nature.*  
673 2001;412: 83–106.
- 674 13. Miramón P, Lorenz MC. A feast for *Candida*: Metabolic plasticity confers an edge for  
675 virulence. *PLoS Pathog.* 2017;13: e1006144.
- 676 14. Pérez JC, Kumamoto CA, Johnson AD. *Candida albicans* commensalism and  
677 pathogenicity are intertwined traits directed by a tightly knit transcriptional  
678 regulatory circuit. *PLoS Biol.* 2013;11: e1001510.
- 679 15. Brown AJP, Odds FC, Gow NAR. Infection-related gene expression in *Candida*  
680 *albicans*. *Curr Opin Microbiol.* 2007;10: 307–313.
- 681 16. Wilson D, Thewes S, Zakikhany K, Fradin C, Albrecht A, Almeida R, et al. Identifying  
682 infection-associated genes of *Candida albicans* in the postgenomic era. *FEMS Yeast*  
683 *Res.* 2009;9: 688–700.
- 684 17. Askew C, Sellam A, Epp E, Hogues H, Mullick A, Nantel A, et al. Transcriptional  
685 regulation of carbohydrate metabolism in the human pathogen *Candida albicans*.  
686 *PLoS Pathog.* 2009;5: e1000612.

- 687 18. Flores CL, Rodríguez C, Petit T, Gancedo C. Carbohydrate and energy-yielding  
688 metabolism in non-conventional yeasts. *FEMS Microbiol Rev.* 2000;24: 507–529.
- 689 19. Rolland F, Wanke V, Cauwenberg L, Ma P, Boles E, Vanoni M, et al. The role of hexose  
690 transport and phosphorylation in cAMP signalling in the yeast *Saccharomyces*  
691 *cerevisiae*. *FEMS Yeast Res.* 2001;1: 33–45.
- 692 20. Brown V, Sexton JA, Johnston M. A glucose sensor in *Candida albicans*. *Eukaryotic*  
693 *Cell.* 2006;5: 1726–1537.
- 694 21. Sabina J, Brown V. Glucose sensing network in *Candida albicans*: a sweet spot for  
695 fungal morphogenesis. *Eukaryotic Cell.* 2009;8: 1314–1320.
- 696 22. Herrero P, Galíndez J, Ruiz N, Martínez-Campa C, Moreno F. Transcriptional  
697 regulation of the *Saccharomyces cerevisiae* *HXK1*, *HXK2* and *GLK1* genes. *Yeast.*  
698 1995;11: 137–144.
- 699 23. Cárdenas ML, Cornish-Bowden A, Ureta T. Evolution and regulatory role of the  
700 hexokinases. *Biochim Biophys Acta.* 1998;1401: 242–264.
- 701 24. Yamada-Okabe T, Sakamori Y, Mio T, Yamada-Okabe H. Identification and  
702 characterization of the genes for N-acetylglucosamine kinase and N-  
703 acetylglucosamine-phosphate deacetylase in the pathogenic fungus *Candida*  
704 *albicans*. *Eur J Biochem.* 2001;268: 2498–2505.
- 705 25. Rao KH, Ghosh S, Natarajan K, Datta A. N-acetylglucosamine kinase, HXK1 is involved  
706 in morphogenetic transition and metabolic gene expression in *Candida albicans*.  
707 *PLoS ONE.* 2013;8: e53638.
- 708 26. Corvey C, Koetter P, Beckhaus T, Hack J, Hofmann S, Hampel M, et al. Carbon Source-  
709 dependent assembly of the Snf1p kinase complex in *Candida albicans*. *J Biol Chem.*  
710 2005;8;280: 25323–25330.

- 711 27. Zaragoza O, Rodríguez C, Gancedo C. Isolation of the *MIG1* gene from *Candida*  
712 *albicans* and effects of its disruption on catabolite repression. J Bacteriol. 2000;182:  
713 320–326.
- 714 28. Moreno F, Ahuatzí D, Riera A, Palomino CA, Herrero P. Glucose sensing through the  
715 Hxk2-dependent signalling pathway. Biochem Soc Trans. 2005;33: 265–268.
- 716 29. Bernardo SMH, Gray K-A, Todd RB, Cheetham BF, Katz ME. Characterization of  
717 regulatory non-catalytic hexokinases in *Aspergillus nidulans*. Mol Genet Genomics.  
718 2007;277: 519–532.
- 719 30. Bork P, Sander C, Valencia A. An ATPase domain common to prokaryotic cell cycle  
720 proteins, sugar kinases, actin, and hsp70 heat shock proteins. Proc Natl Acad Sci  
721 USA. 1992;89: 7290–7294.
- 722 31. Kuser PR, Krauchenco S, Antunes OA, Polikarpov I. The high-resolution crystal  
723 structure of yeast hexokinase PII with the correct primary sequence provides new  
724 insights into its mechanism of action. J Biol Chem. 2000;275: 20814–20821.
- 725 32. Reuss O, Vik A, Kolter R, Morschhäuser J. The SAT1 flipper, an optimized tool for gene  
726 disruption in *Candida albicans*. Gene. 2004;341: 119–127.
- 727 33. Moreno F, Herrero P. The hexokinase 2-dependent glucose signal transduction  
728 pathway of *Saccharomyces cerevisiae*. FEMS Microbiol Rev. 2002;26: 83–90
- 729 34. Rande-Gil F, Herrero P, Sanz P, Prieto JA, Moreno F. Hexokinase PII has a double  
730 cytosolic-nuclear localisation in *Saccharomyces cerevisiae*. FEBS Lett. 1998;425: 475–  
731 478.
- 732 35. Fernández-García P, Peláez R, Herrero P, Moreno F. Phosphorylation of yeast  
733 hexokinase 2 regulates its nucleocytoplasmic shuttling. J Biol Chem. 2012;287:  
734 42151–42164.



- 735 36. Sexton JA, Brown V, Johnston M. Regulation of sugar transport and metabolism by  
736 the *Candida albicans* Rgt1 transcriptional repressor. *Yeast*. 2007;24: 847–860.
- 737 37. Eisman B, Alonso-Monge R, Román E, Arana D, Nombela C, Pla J. The Cek1 and Hog1  
738 mitogen-activated protein kinases play complementary roles in cell wall biogenesis  
739 and chlamyospore formation in the fungal pathogen *Candida albicans*. *Eukaryotic*  
740 *Cell*. 2006;5: 347–358.
- 741 38. Sánchez-Fresneda R, Guirao-Abad JP, Argüelles A, González-Párraga P, Valentín E,  
742 Argüelles J-C. Specific stress-induced storage of trehalose, glycerol and D-arabitol in  
743 response to oxidative and osmotic stress in *Candida albicans*. *Biochem Biophys Res*  
744 *Commun*. 2013;430: 1334–1339.
- 745 39. Sellam A, van het Hoog M, Tebbji F, Beaurepaire C, Whiteway M, Nantel A. Modeling  
746 the transcriptional regulatory network that controls the early hypoxic response in  
747 *Candida albicans*. *Eukaryotic Cell*. 2014;13: 675–690.
- 748 40. Setiadi ER, Doedt T, Cottier F, Noffz C, Ernst JF. Transcriptional response of *Candida*  
749 *albicans* to hypoxia: linkage of oxygen sensing and Efg1p-regulatory networks. *J Mol*  
750 *Biol*. 2006;361: 399–411.
- 751 41. Lin C-J, Chen Y-L. Conserved and Divergent Functions of the cAMP/PKA Signaling  
752 Pathway in *Candida albicans* and *Candida tropicalis*. *J Fungi (Basel)*. 2018;4: 68.
- 753 42. Biswas S, Van Dijck P, Datta A. Environmental sensing and signal transduction  
754 pathways regulating morphopathogenic determinants of *Candida albicans*. *Microbiol*  
755 *Mol Biol Rev*. 2007;71: 348–376.
- 756 43. Daran-Lapujade P, Rossell S, van Gulik WM, Luttik MAH, de Groot MJL, Slijper M, et  
757 al. The fluxes through glycolytic enzymes in *Saccharomyces cerevisiae* are

- 758           predominantly regulated at post-transcriptional levels. Proc Natl Acad Sci USA.  
759           2007;104: 15753–15758.
- 760           44. Sandai D, Yin Z, Selway L, Stead D, Walker J, Leach MD, et al. The evolutionary  
761           rewiring of ubiquitination targets has reprogrammed the regulation of carbon  
762           assimilation in the pathogenic yeast *Candida albicans*. MBio. 2012;3: e00495-12.
- 763           45. Cairey-Remonnay A, Deffaud J, Wésolowski-Louvel M, Lemaire M, Soulard A.  
764           Glycolysis controls plasma membrane glucose sensors to promote glucose signaling  
765           in yeasts. Mol Cell Biol. 2015;35: 747–757.
- 766           46. Friis RMN, Wu BP, Reinke SN, Hockman DJ, Sykes BD, Schultz MC. A glycolytic burst  
767           drives glucose induction of global histone acetylation by picNuA4 and SAGA. Nucleic  
768           Acids Res. 2009;37: 3969–3980.
- 769           47. Diderich JA, Raamsdonk LM, Kruckeberg AL, Berden JA, Van Dam K. Physiological  
770           properties of *Saccharomyces cerevisiae* from which hexokinase II has been deleted.  
771           Appl Environ Microbiol. 2001;67: 1587–1593.
- 772           48. Mates N, Kettner K, Heidenreich F, Pursche T, Migotti R, Kahlert G, et al. Proteomic  
773           and Functional Consequences of Hexokinase Deficiency in Glucose-repressible  
774           *Kluyveromyces lactis*. Mol Cell Proteomics. 2014;13: 860–875.
- 775           49. Vega M, Riera A, Fernández-Cid A, Herrero P, Moreno F. Hexokinase 2 Is an  
776           Intracellular Glucose Sensor of Yeast Cells That Maintains the Structure and Activity  
777           of Mig1 Protein Repressor Complex. J Biol Chem. 2016;291: 7267–7285.
- 778           50. Ahuatzi D, Riera A, Peláez R, Herrero P, Moreno F. Hxk2 regulates the  
779           phosphorylation state of Mig1 and therefore its nucleocytoplasmic distribution. J Biol  
780           Chem. 2007;282: 4485–4493.

- 781 51. Murad AM, d'Enfert C, Gaillardin C, Tourneu H, Tekaiia F, Talibi D, et al. Transcript  
782 profiling in *Candida albicans* reveals new cellular functions for the transcriptional  
783 repressors *CaTup1*, *CaMig1* and *CaNrg1*. *Mol Microbiol*. 2001;42: 981–993.
- 784 52. Petter R, Chang YC, Kwon-Chung KJ. A gene homologous to *Saccharomyces cerevisiae*  
785 *SNF1* appears to be essential for the viability of *Candida albicans*. *Infect Immun*.  
786 1997;65: 4909–4917.
- 787 53. Broxton CN, He B, Bruno VM, Culotta VC. A role for *Candida albicans* superoxide  
788 dismutase enzymes in glucose signaling. *Biochem Biophys Res Commun*. 2018;495:  
789 814–820.
- 790 54. Cottier F, Tan ASM, Xu X, Wang Y, Pavelka N. *MIG1* regulates resistance of *Candida*  
791 *albicans* against the fungistatic effect of weak organic acids. *Eukaryotic Cell*.  
792 2015;14: 1054–1061.
- 793 55. Rodaki A, Bohovych IM, Enjalbert B, Young T, Odds FC, Gow NAR, et al. Glucose  
794 promotes stress resistance in the fungal pathogen *Candida albicans*. *Mol Biol Cell*.  
795 2009;20: 4845–4855.
- 796 56. Raghevendran V, Gombert AK, Christensen B, Kötter P, Nielsen J. Phenotypic  
797 characterization of glucose repression mutants of *Saccharomyces cerevisiae* using  
798 experiments with <sup>13</sup>C-labelled glucose. *Yeast*. 2004;21: 769–779.
- 799 57. Free SJ. Fungal cell wall organization and biosynthesis. *Adv Genet*. 2013;81: 33–82.
- 800 58. Synnott JM, Guida A, Mulhern-Haughey S, Higgins DG, Butler G. Regulation of the  
801 hypoxic response in *Candida albicans*. *Eukaryotic Cell*. 2010;9: 1734–1746.
- 802 59. Johnston M. Feasting, fasting and fermenting. Glucose sensing in yeast and other  
803 cells. *Trends Genet*. 1999;15:29–33.

- 804 60. Schwartz DS, Larsh HW. Comparative activities of glycolytic enzymes in yeast and  
805 mycelial forms of *Candida albicans*. Mycopathologia. 1982;78: 93–98.
- 806 61. Doedt T, Krishnamurthy S, Bockmühl DP, Tebarth B, Stempel C, Russell CL, et al.  
807 APSES proteins regulate morphogenesis and metabolism in *Candida albicans*. Mol  
808 Biol Cell. 2004;15: 3167–3180.
- 809 62. Fuchs BB, Eby J, Nobile CJ, El Khoury JB, Mitchell AP, Mylonakis E. Role of  
810 filamentation in *Galleria mellonella* killing by *Candida albicans*. Microbes Infect.  
811 2010;12: 488–496.
- 812 63. Perdoni F, Falleni M, Tosi D, Cirasola D, Romagnoli S, Braidotti P, et al. A histological  
813 procedure to study fungal infection in the wax moth *Galleria mellonella*. Eur J  
814 Histochem. 2014;58: 2428.
- 815 64. Bain J, Gow NAR, Erwig L-P. Novel insights into host-fungal pathogen interactions  
816 derived from live-cell imaging. Semin Immunopathol. 2015;37: 131–139.
- 817 65. Erwig LP, Gow NAR. Interactions of fungal pathogens with phagocytes. Nat Rev  
818 Microbiol. 2016;14: 163–176.
- 819 66. Shukla E, Thorat LJ, Nath BB, Gaikwad SM. Insect trehalase: physiological  
820 significance and potential applications. Glycobiology. 2015;25: 357–367.
- 821 67. Tucey TM, Verma J, Harrison PF, Snelgrove SL, Lo TL, Scherer AK, et al. Glucose  
822 homeostasis is important for immune cell viability during *Candida* challenge and  
823 host survival of systemic fungal infection. Cell Metab. 2018;27: 988-1006.
- 824 68. Milne SW, Cheetham J, Lloyd D, Aves S, Bates S. Cassettes for PCR-mediated gene  
825 tagging in *Candida albicans* utilizing nourseothricin resistance. Yeast. 2011;28: 833–  
826 841.

- 827 69. Walther A, Wendland J. An improved transformation protocol for the human fungal  
828 pathogen *Candida albicans*. *Curr Genet*. 2003;42: 339–343.
- 829 70. Rolland S, Hnatova M, Lemaire M, Leal-Sanchez J, Wésolowski-Louvel M. Connection  
830 between the Rag4 glucose sensor and the KIRgt1 repressor in *Kluyveromyces lactis*.  
831 *Genetics*. 2006;174: 617–626.
- 832 71. Kuzmic P. Program DYNAFIT for the analysis of enzyme kinetic data: application to  
833 HIV proteinase. *Anal Biochem*. 1996;237: 260–273.
- 834 72. Collart MA, Oliviero S. Preparation of yeast RNA. *Curr Protoc Mol Biol*. 2001;23:  
835 13121-13125
- 836 73. Dementhon K, El-Kirat-Chatel S, Noël T. Development of an in vitro model for the  
837 multi-parametric quantification of the cellular interactions between *Candida* yeasts  
838 and phagocytes. *PLoS ONE*. 2012;7: e32621.

839

## 840 **Figure Captions**

841 **Fig 1. The hexose kinase system in *C. albicans*.** (A) The hexose kinase genes are located on  
842 *C. albicans* chromosome RA (Ca22chrRA\_C\_albicans\_SC5314:994,376..997,830). Glucokinase  
843 genes are oriented in opposite directions and bordered by highly homologous regions (light  
844 green). (B) Hexose phosphorylation rates in *C. albicans* wild type and hexose kinase mutant  
845 cell extracts. For each strain, the amount of glucose-6-phosphate produced was measured  
846 and expressed as a percentage of the wild type strain. Data are presented as a mean (+  
847 standard deviation) of 3 independent experiments performed in triplicates (n = 9); \*\*\*\* P <  
848 0.0001; one-way ANOVA using Dunnett's method. (C) Kinetic constant of hexose kinases in *C.*  
849 *albicans* in the presence of glucose. The experiment was performed in triplicate.  
850 Representative data are presented here.

851

852 **Fig 2. Hexokinase 2 is necessary to sustain *C. albicans* growth.** Wild type and mutant strains  
853 were grown to the mid-log phase on medium containing 2% of various carbon sources  
854 (glucose, fructose, mannose, galactose, glycerol or lactate). A 96-well plate containing  
855 appropriate medium was inoculated with each strain at starting OD<sub>600nm</sub> = 0.2. Cells growth  
856 was performed at 30°C and recorded during 48 h using microplates reader (TECAN infinite  
857 pro200). Data are presented as a mean (± standard deviation) of 3 independent experiments  
858 performed in triplicates (n = 9).

859

860 **Fig 3. Hexokinase and glucokinases expression.** (A) Relative expression of *CaHXX2* and  
861 *CaGLK1/4* in wild type strain in presence of 2% lactate, 0.1% and 2% glucose. (B) Relative  
862 expression of *CaHXX2* and *CaGLK1/4* in wild type strain in presence of various carbon  
863 sources (2% lactate, glycerol, glucose, fructose or mannose). For the panels A and B the  
864 results were normalized to the expression of *CaACT1*. The level of *CaHXX2* and *CaGLK1/4*  
865 mRNAs was expressed relatively to their abundance in 2% lactate, which was set to 1. (C)  
866 Relative expression of *CaHXX2* and *CaGLK1/4* in wild type and hexose kinase mutant strains  
867 after growth in 2% YPG. The expression was normalized to the level of the *CaACT1* mRNA  
868 internal control. mRNA levels were expressed relatively to their abundance in the wild type  
869 strain, which was set to 1. Results represent a mean (+ Standard Deviation) of 3 independent  
870 experiments performed in duplicate (n=6); ns, non-significant; \*\* P = 0.002; \*\*\*\* P < 0.0001.  
871 Pvalues were calculated by one-way ANOVA using Tukey's method. (D) Strains of *C. albicans*  
872 expressing C-terminally GFP-tagged CaHxk2 or CaGlk1 were cultivated in presence of 0.1, 0.5  
873 or 2% glucose. Whole cell lysates were analyzed for CaHxk2-GFP and CaGlk1-GFP by Western  
874 blotting, using α-GFP antibody. Detection of total proteins by in-gel Coomassie staining was

875 used as a loading control (total extract). Western blots were performed 3 times.  
876 Representative data are presented here. (E) and (F) *C. albicans* expressing C-terminally GFP-  
877 tagged CaHxk2 or CaGlc1 were cultivated in presence of various carbon sources (2%). Whole  
878 cell lysates were analyzed for CaHxk2-GFP and CaGlc1-GFP by Western blotting, using  $\alpha$ -GFP  
879 antibody. Detection of total proteins by in-gel Coomassie staining was used as a loading  
880 control (total extract). Western blots were performed 3 times. Representative data are  
881 presented here.

882

883 **Fig 4. Hexokinase 2, but not glucokinases, participates to glucose repression. (A)**

884 Subcellular localization of CaHxk2-GFP was followed using fluorescence microscopy. Direct  
885 visualization of CaHxk2-GFP in live cells of *C. albicans* was performed as described in the  
886 methods section. Nuclei were identified using DAPI staining. Transformants expressing  
887 CaHxk2-GFP were grown on medium containing 2%, 0.1% or 0.05% glucose or 2% lactate as  
888 carbon source. GFP and DAPI localization was monitored in live cell cultures using a Zeiss  
889 Axioskop 2 Plus fluorescence microscope. Images were taken with a Zeiss AxioCam MR  
890 camera using AxioVision software. (B) Expression of glucose permeases, controlled by the  
891 Sugar Receptor Repressor pathway (*CaHGT12*, *CaHXT10* and *CaHGT7*) or not (*CaHGT8*) was  
892 measured by qPCR in each strain. Cells were cultivated in the presence of 2% lactate and  
893 then transferred for 1 h in 2% glucose before RNA was extracted. Expression levels were  
894 normalized to the expression of *CaACT1*. For each permease, the mRNA levels were  
895 expressed relatively to their abundance in the wild type strain, which was set at 1. Results  
896 represent a mean (+ Standard Deviation) of 3 independent experiments performed in  
897 duplicate; (n=6), \*\* P = 0.002; \*\*\*\* P < 0.0001. Pvalue were calculated by one-way ANOVA  
898 using Tukey's method.

899

900 **Fig 5. Hexose kinase enzymes mediate protection during harmful environmental**  
901 **challenges.** (A) Growth of the wild type and hexose kinase mutant strains in YPG and  
902 exposed to various stresses was expressed as a percentage of growth in absence of stress  
903 which was set to 100% (black line). (B) Growth of the wild type and hexose kinase mutant  
904 strains under hypoxic conditions in 2% glucose YPG was expressed as a percentage of growth  
905 in normoxia which was set to 100% (black line). (C) Relative expression of *CaHXX2* or  
906 *CaGLK1/4* measured in normoxia (N) or hypoxia (H) during growth in YPG 2% glucose.  
907 Transcript level was analyzed by qPCR at 0, 30 and 60 min. Results were normalized to the  
908 *CaACT1* transcript level. The level of *CaHXX2* and *CaGLK1/4* mRNAs was expressed relatively  
909 to their abundance at time zero, which was set to 1. Histograms represents a mean of 3  
910 independent experiments performed in triplicate (n=9); ns, non-significant; \*\*\* P = 0.0002;  
911 \*\*\*\* P < 0.0001. Pvalue were calculated by one-way ANOVA using Tukey's method. (D)  
912 Strains of *C. albicans* expressing CaHxk2-GFP or CaGlk1-GFP were grown in 2% glucose YPG  
913 to the mid log phase. Cells were transferred into the new medium containing 2% glucose  
914 and exposed (N= Normoxia) or not (H= Hypoxia) to oxygen. Following this shift, cells were  
915 collected at 0, 20, 60, 90 and 120 min and the detection of CaHxk2-GFP or CaGlk1-GFP was  
916 performed by Western Blot using  $\alpha$ -GFP antibody. Detection of total proteins by in-gel  
917 Coomassie staining was used as a loading control (total extract).

918

919 **Fig 6. Glycolytic flux is required to sustain hyphal growth of *C. albicans*.** (A) *C. albicans* wild  
920 type and mutant strains were grown during 3 days at 37°C on spider, serum or N-acetyl-  
921 glucosamine medium. For each medium, the upper and middle panels show photographs of  
922 macroscopic appearance of the colonies. Photographs present in the lower panel were



923 obtained using Zeiss Axioskop 2 Plus microscope with dark field and show the microscopic  
924 aspect. (B) Relative expression of *CaHXX2* and *CaGLK1/4* in the wild type strain during  
925 filamentation after transfer from 0.5% YPG to 5% serum liquid medium. Expression level of  
926 *CaHXX2* and *CaGLK1/4* was measured by qPCR, at different time points (0, 5, 20, 30 and 60  
927 minutes), and normalized to the level of the *CaACT1* mRNA internal control. mRNAs level  
928 was expressed relatively to their abundance at time zero, which was set to 1. Results  
929 represent a mean (+ Standard Deviation) of 3 independent experiments performed in  
930 duplicate (n=6); ns, non-significant; \*\*\*\* P < 0.0001. Pvalue were calculated by one-way  
931 ANOVA using Tukey's method.

932

933 **Fig 7. Hexokinase 2 is required for full virulence of *C. albicans*.** (A) *Galleria mellonella* model  
934 of systemic infection.  $2.5 \times 10^5$  cells of wild type (*SC5314*), complemented (*Cahxk2Δ/Δc/c*) or  
935 hexose kinase mutant strains were injected into the hemocoel at the last left-pro leg of 30  
936 *Galleria* larvae. Sterile NaCl (0,9%) was injected into control larvae. Survival was monitored  
937 for 8 days at 37°C and presented in a Kaplan-Meier plot. Statistical analysis was performed  
938 using log rank tests; ns, non-significant; \*\*\* P = 0.0002; \*\*\*\* P < 0.0001. *Cahxk2Δ/Δ*,  
939 *Cahxk2glk1Δ/Δ* and *Caglk1glk4Δ/Δ* mutant strains are significantly less virulent compared to  
940 the wild type strain ( $P_{\text{value}} \leq 0.0001$ ). The difference observed between *Caglk1Δ/Δ* mutant  
941 and the wild type strain is not significant ( $P_{\text{value}} > 0.05$ ). The complemented strain exhibits  
942 higher virulence than hexokinase mutants but lesser than the wild type ( $P_{\text{value}} = 0.002$ ). (B)  
943 Analysis of mouse macrophage interaction with live *C. albicans* cells in stationary phase at  
944 MOI 1:5 (1 macrophage for 5 yeasts) over a 24-hour time course experiment. The horizontal  
945 bars represent the macrophage survival, indicated as a percentage on the left side of the  
946 bar. The white part of the bars represents the percentage of non-phagocytosing

947 macrophages. The shades tones part represents the percentage of phagocytosing  
948 macrophages. (C) Representative pictures of the J774 macrophages after 24 h of infection  
949 with wild type and hexose kinase mutant strains in culture flasks at MOI 1 :5. The scale bars  
950 represent 100  $\mu$ m.

## 951 **Supporting information**

952 **S1 Table.** Glucose and ATP binding sites and structural domains of yeast hexokinases and  
953 glucokinases.

954 **S2 Table.** *C. albicans* strains used in this study.

955 **S3 Table.** Plasmids used in this study.

956 **S4 Table.** Primers used in this study.

957 **S1 Appendix.** Construction of *CaHXK2* deletion and complementation cassettes.

958 **S1 Fig.** *C. albicans* wild type and mutant strains divide equally during macrophage  
959 phagocytosis.

960

**A**

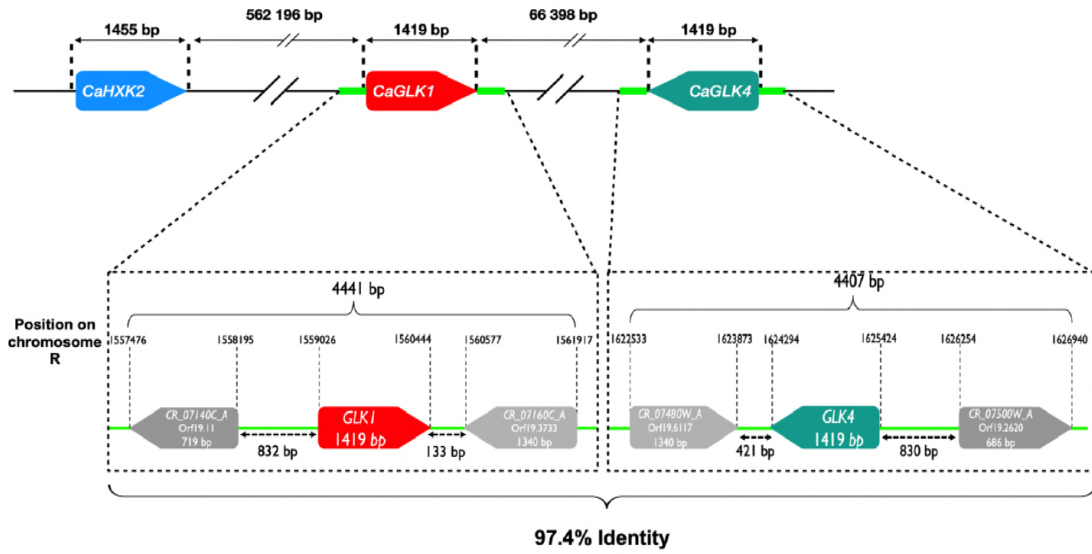

**B**

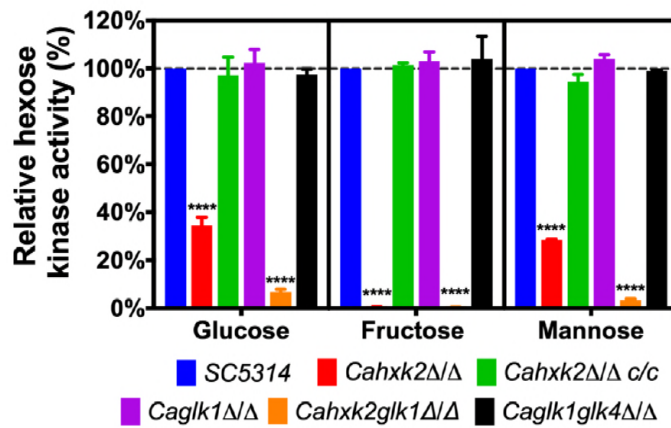

**C**

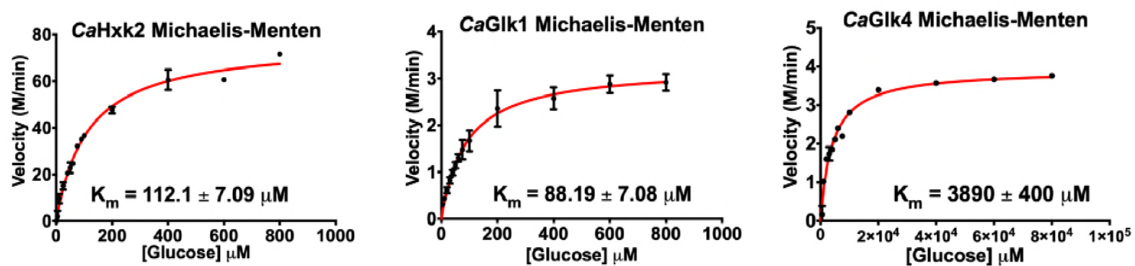

Figure 1

961

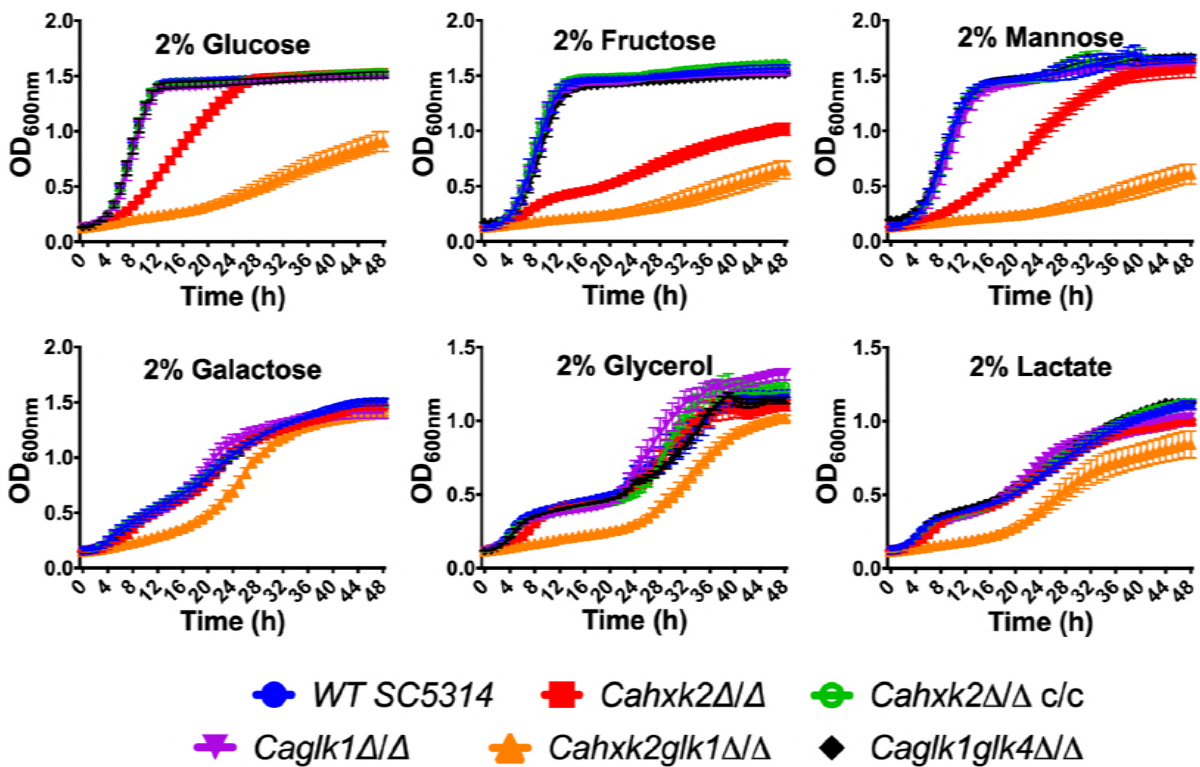

Figure 2

962

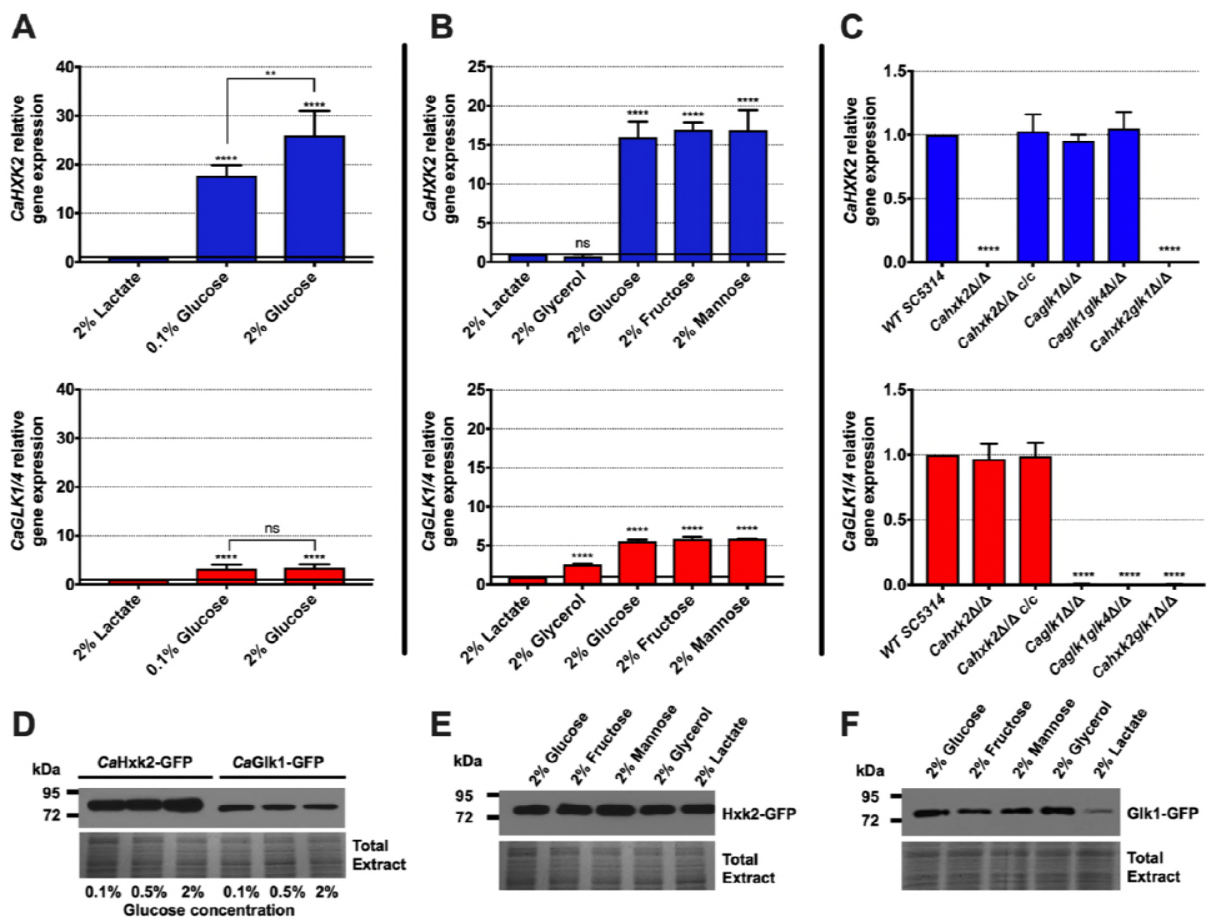

Figure 3

963

**A**

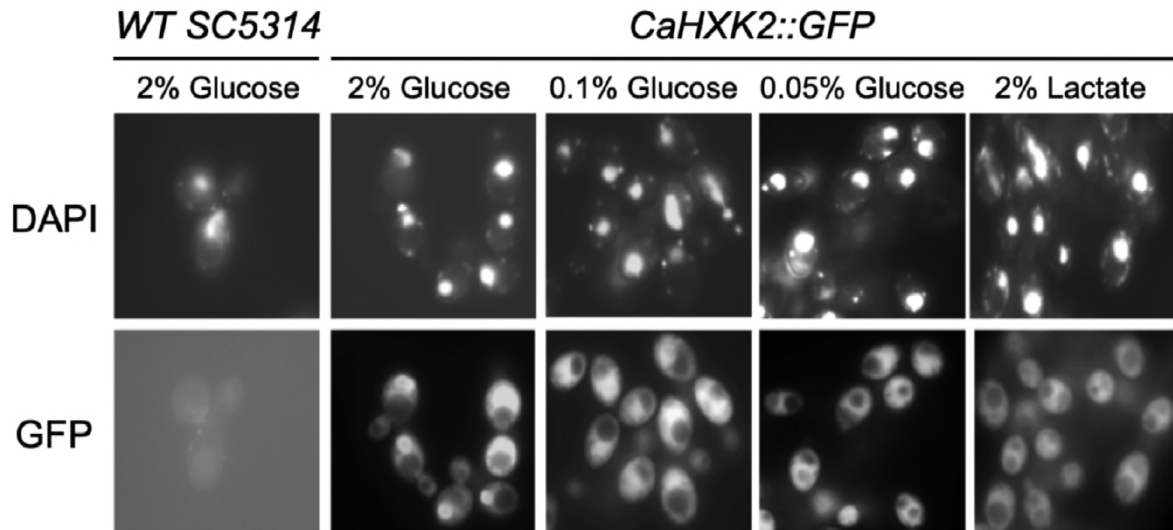

**B**

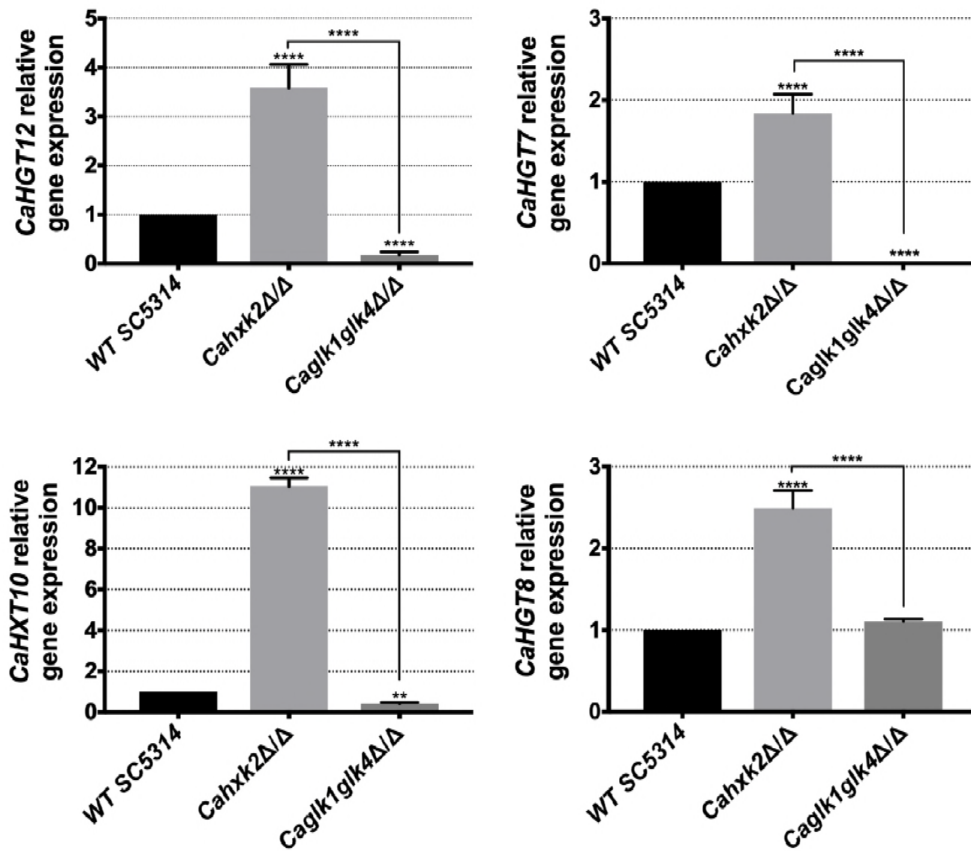

Figure 4

964

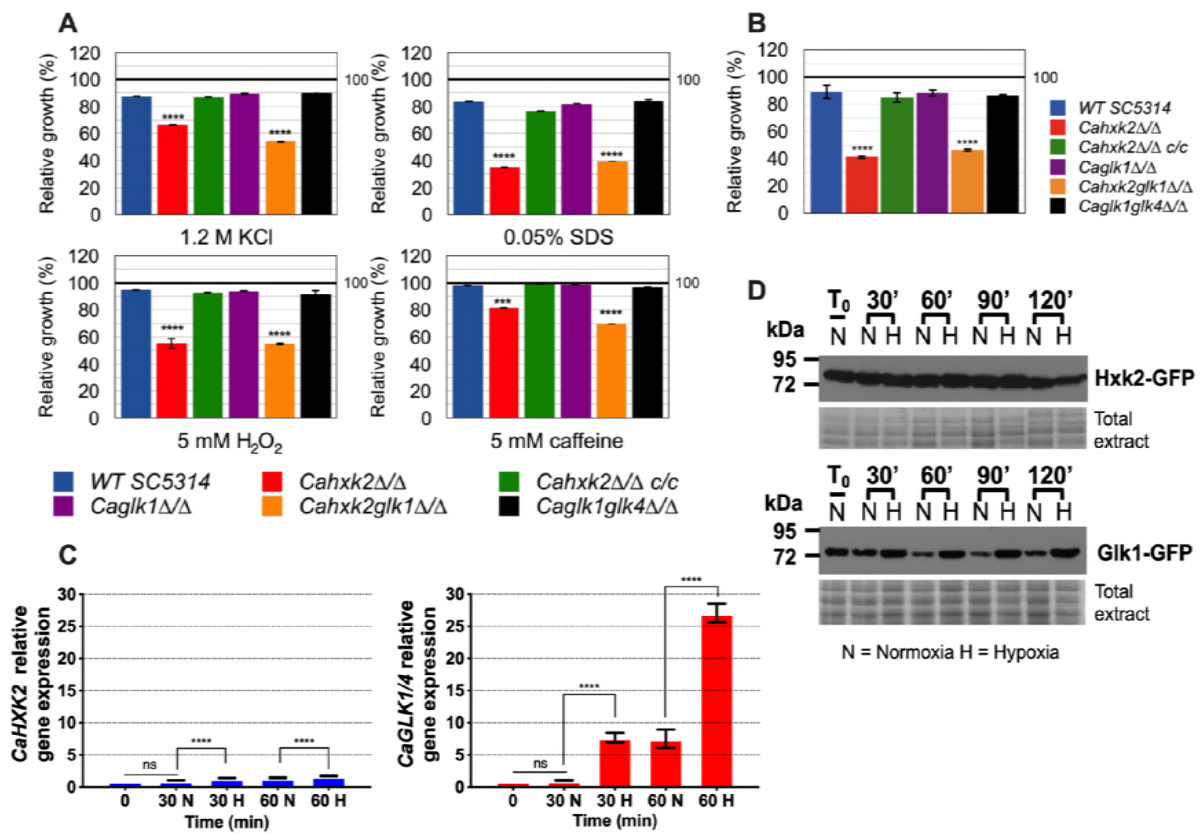

Figure 5

965

**A**

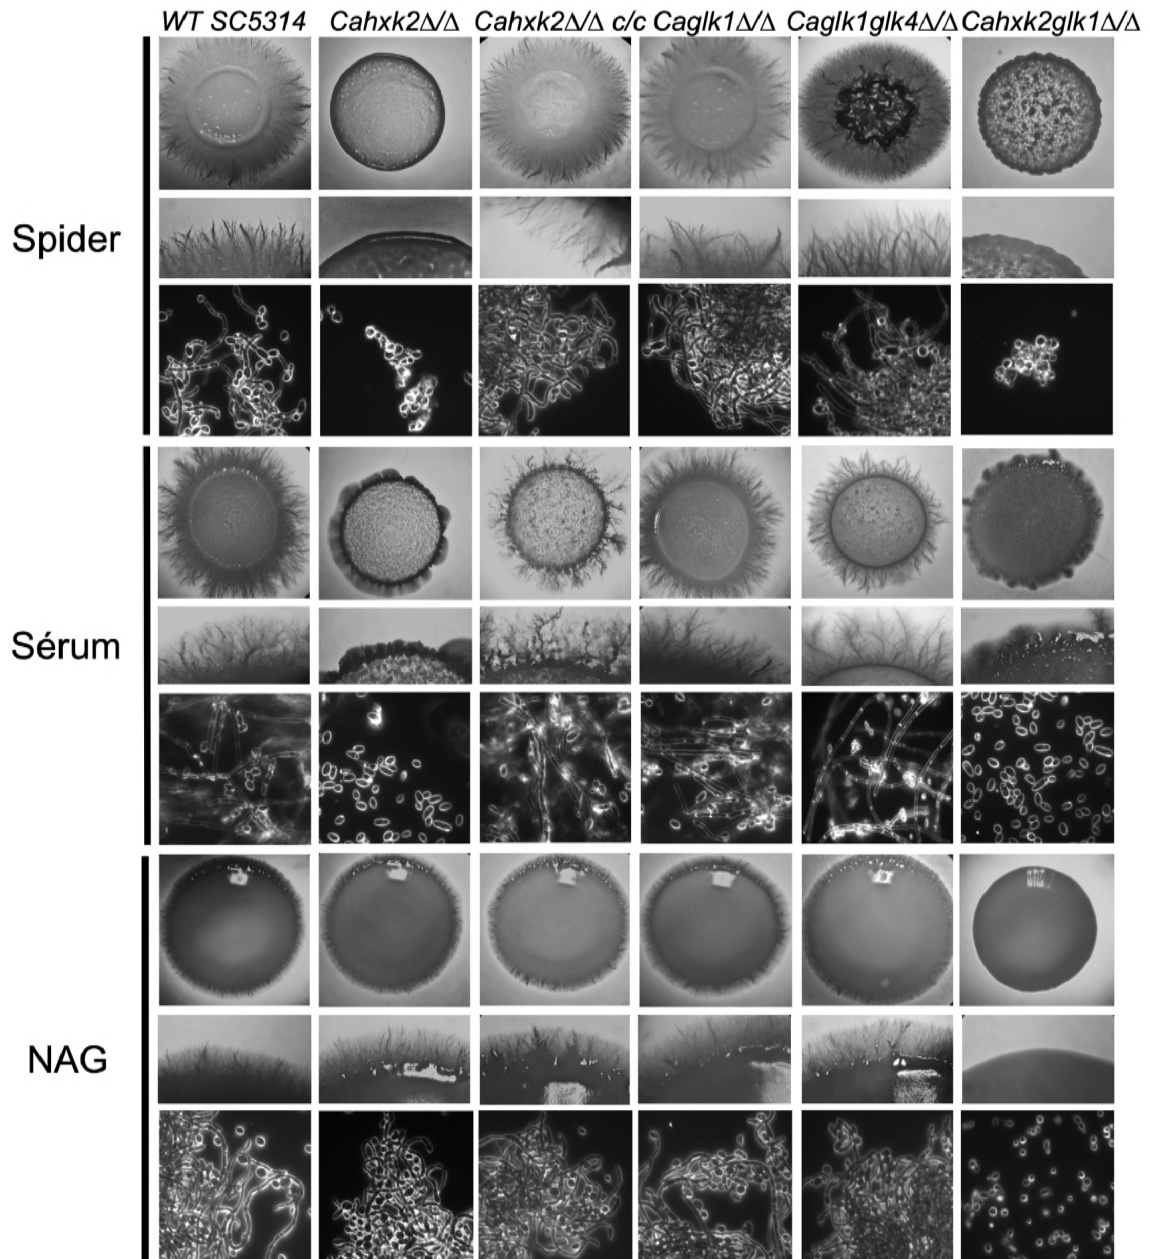

**B**

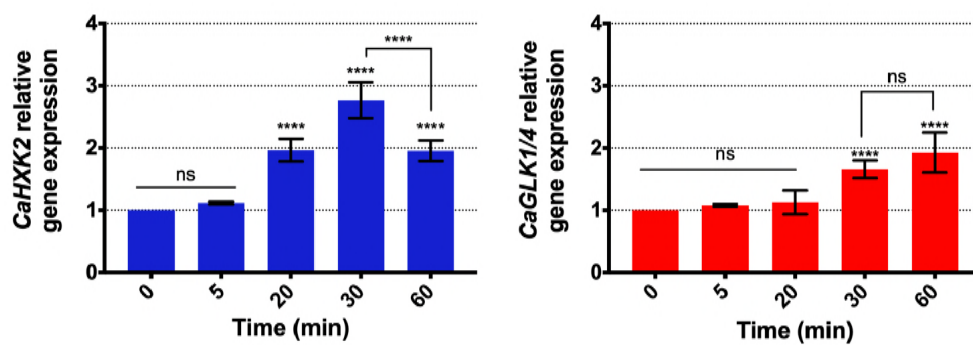

Figure 6



966

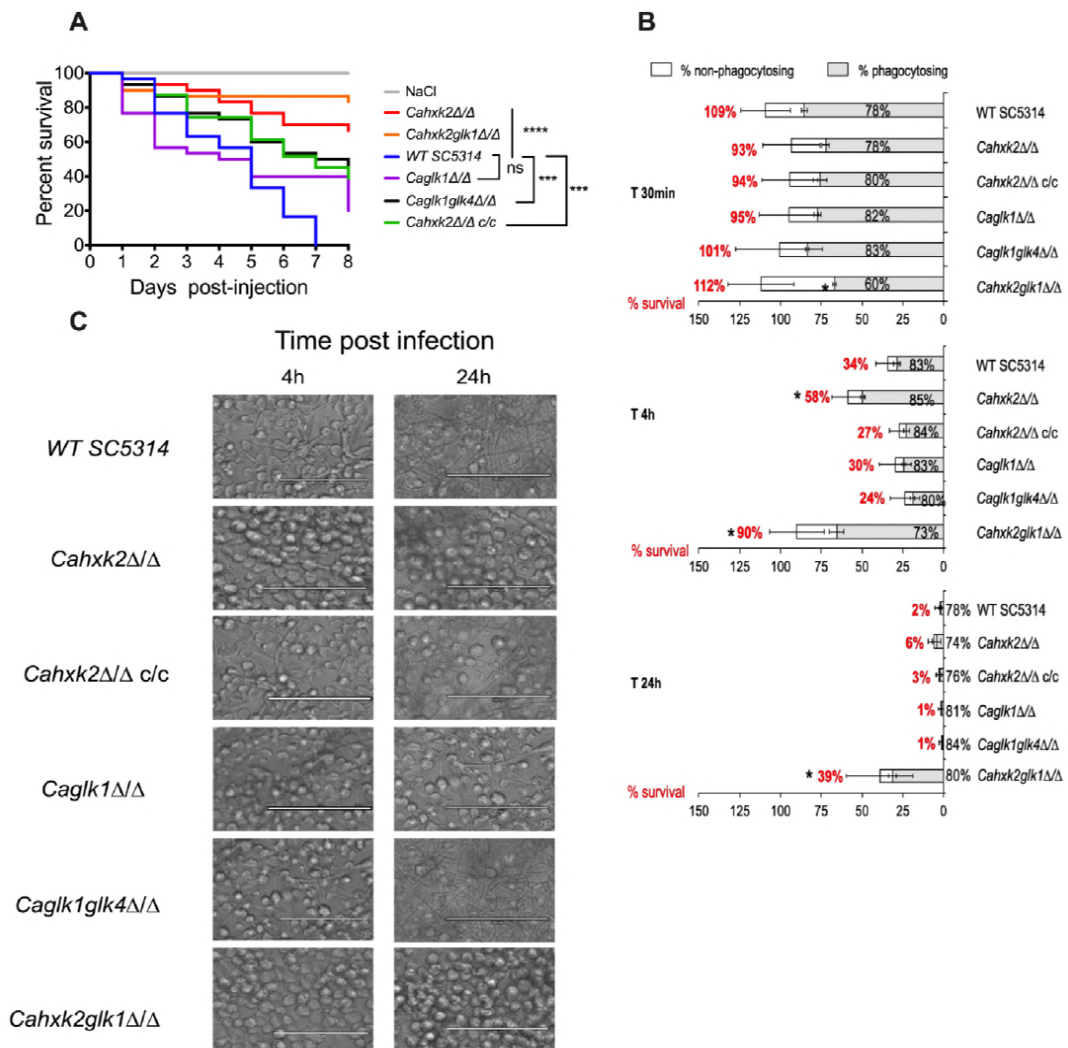

Figure 7
